**Anxiety-related interventions in rodent defense behaviors:  
systematic review and meta-analyses**

**Authors**

Farhan Mohammad<sup>1</sup>, Joses Ho<sup>2</sup>, Chun Lei Lim<sup>2</sup>, Jia Hern Woo<sup>2</sup>, Dennis Jun Jie Poon<sup>2</sup>,  
Bhumika Lamba<sup>2</sup> & Adam Claridge-Chang<sup>1, 2, 3, \*</sup>

**Affiliations**

1. Program in Neuroscience and Behavioral Disorders, Duke-NUS Graduate Medical School, Singapore 138673
2. Institute for Molecular and Cell Biology, Agency for Science Technology and Research, Singapore 138673
3. Department of Physiology, National University of Singapore, Singapore 138673

\*Corresponding author: [claridge-chang.adam@duke-nus.edu.sg](mailto:claridge-chang.adam@duke-nus.edu.sg)

## ABSTRACT

Rodent defense behavior assays have been widely used as preclinical models of anxiety to study possible therapeutic anxiety-reducing interventions. However, some proposed anxiety-modulating factors - genes, drugs and stressors - have had discordant effects across different studies. To reconcile the effect sizes of purported anxiety factors, we performed systematic review and meta-analyses of the literature on ten anxiety-linked interventions, as examined in the elevated plus maze, open field and light-dark box assays. Diazepam, 5-HT<sub>1A</sub> receptor gene knockout and overexpression, SERT gene knockout and overexpression, pain, restraint, social isolation, corticotropin-releasing hormone and *Crhr1* were selected for review. Eight interventions had statistically significant effects on rodent anxiety, while *Htr1a* overexpression and *Crh* knockout did not. Evidence for publication bias was found in the diazepam, *Htt* knockout, and social isolation literatures. The *Htr1a* and *Crhr1* results indicate a disconnect between preclinical science and clinical research. Furthermore, the meta-analytic data confirmed that genetic SERT anxiety effects were paradoxical in the context of the clinical use of SERT inhibitors to reduce anxiety.

## Keywords

anxiety, defense, behavior, rodent, stress, serotonin, meta-analysis, pain, isolation, receptor, transporter, corticotropin releasing hormone

## 1. INTRODUCTION

The anxiety disorders are among the costliest classes of mental disorders, both in morbidity and economic cost (Baldwin et al., 2014; DiLuca and Olesen, 2014). Development of anxiety-reducing (anxiolytic) drugs has been a major focus of the pharmaceutical industry and academic neuropsychiatric research, though no new drug types have been adopted since the introduction of selective serotonin uptake inhibitors (SSRIs) and other antidepressants for the treatment of anxiety disorders (Griebel and Holmes, 2013; Tone, 2009). Anxiety research relies on similarities between human emotional behavior and behaviors in animals (Darwin, 1998), specifically rat and mouse (Prut and Belzung, 2003). While there are many rodent behavioral paradigms that aim to model anxiety-like behaviors, three **anxiety-related defense behavior (ARDEB)** assays that specifically aim to measure rodent anxiety have been established, also referred to as ‘approach-avoidance conflict tests’ (Griebel and Holmes, 2013). The most widely-used ARDEB assays are the elevated plus maze (EPM), the light-dark box (LD) and the open field (OF), the first, second and fifth most widely used rodent anxiety assays, respectively (Griebel and Holmes, 2013). All three arena types contain a sheltered domain (e.g., the closed arms in EPM) and an exposed region. It is believed that avoidance of the exposed portions of the chamber reports on anxiety-like states in the rodent brain. The ARDEB assays are accepted as preclinical assays of anxiety disorders, by reference to classic studies that established their validity with a panel of drugs known to have anxiety-modulating effects in humans (Crawley and Goodwin, 1980; Pellow et al., 1985; Simon et al., 1994).

Rodent research has been implicated in the largely frustrated efforts to develop new types of anxiolytics (Griebel and Holmes, 2013). The literature regarding defense

behaviors is contradictory about the size and even the direction of many interventions that are proposed to be anxiolytic or anxiogenic (together ‘anxiotropic’) (Griebel and Holmes, 2013; Prut and Belzung, 2003). This is true even for some anxiety-related factors with major clinical relevance, such as the serotonin transporter (SERT/*Htt*), the target of the SSRIs. As for the assessment of clinical anxiety interventions (Baldwin et al., 2014), a solid evidence base of the effect of anxiety interventions in the rodent ARDEB assays is necessary to guide decisions about further basic research and therapeutic development (Vesterinen et al., 2014). To better understand the widespread discordance, we conducted a quantitative review of the effect of purported anxiety factors on rodent ARDEB. The primary aim of this study was to examine the relevance of these factors and to estimate the magnitude of their effects on rodent anxiety. A secondary goal of this analysis was to examine patterns in ARDEB factor evidence: gaps in the literature, the extent of standardization/heterogeneity and publication bias. Synthesizing the data on anxiety-targeted interventions might also assist in understanding why these assays have not led to new therapies. Once confirmed by meta-analysis, known effective anxiotropic interventions could be also adopted as benchmarks against which to validate new rodent assays and/or tests of more genetically tractable model animal species (e.g. *Drosophila* and zebrafish).



## **2. MATERIALS AND METHODS**

### ***2.1 Literature review***

Genes, drugs and environmental interventions that had been proposed to be involved in anxiety were identified by a literature search of review articles on the field of anxiety. From two histories of anxiety research (Griebel and Holmes, 2013; Tone, 2009), a list of ten anxiotropic interventions were chosen to be included in the systematic review, either due to their clinical relevance (e.g., diazepam, Htt), their role as an example of a class of proposed anxiety-related factors (e.g., isolation), or their connection to possible forthcoming therapeutics (e.g. Crh). A systematic review was conducted to identify published articles addressing experimental outcomes in rodents from the EPM, OF, or LD assays for these interventions. The literature for each genetic, pharmacological or environmental intervention was identified by a search on PubMed and EMBASE using specific search phrases (Table 1). The selective serotonin reuptake inhibitors (SSRIs), which have clinical importance (Baldwin et al., 2014), a very large number of studies conducted on them (Griebel and Holmes, 2013), and controversial efficacy (Kirsch et al., 2008) will be the subject of a separate study, currently in preparation.

### ***2.2 Eligibility criteria and study selection***

Bibliographic data (including study ID, date of publication, title and abstract) of studies identified by the search phrases were exported to a spreadsheet. Each article on this list was then reviewed at one or more of four levels of detail (title, abstract, full text and a detailed review of experimental design) to determine their eligibility for the review. Studies were required to be written in English and to have reported ARDEB in adult rats or mice. We required that each included study contain (1) primary behavior data

from either an OF, EPM, or LD experiment for at least one of the interventions of interest, (2) suitable control data and (3) the relevant statistics (mean, standard error or standard deviation, and sample sizes of both control and intervention groups). Experiments that used combination treatments were excluded. Only studies in which adult rodents were assayed were included. For gene knockout and overexpression interventions, only experiments using a lifetime loss of function were included in the meta-analyses. All eligible experiments from all eligible studies were included in the ten meta-analyses (Table 1).

### ***2.3 Data items and extraction***

The following data were collected from each of the included studies: authors, year of publication, figure and panel numbers, species, genotype, and mean, standard error of the mean and sample size (N) of each intervention and its related control group. Graphically presented data were extracted from Portable Document Format (PDF) files with the Measuring Tool in Adobe Acrobat Pro. All extracted data were checked by a second researcher. For values extracted from tables, the check consisted of ensuring the values were identical. For values extracted from graphical data (e.g. bar plots), the check consisted of a visual inspection to ensure that the extracted value matched the graphical data. Extraction discrepancies were reconciled by conference between the primary extractor and the researcher who identified the discrepancy.

### ***2.4 Summary measures***

The following behavioral metrics were extracted from the articles: in OF studies, percent or total time spent at the center; in EPM studies, percent or total time spent on the open arm; in LD studies, percent or total time spent in the bright area. To synthesize these time-based metrics from the three assays, all estimates were

standardized to Hedges'  $g$ , a preferred variant of Cohen's  $d$  that uses the pooled standard deviation and is corrected for bias using Hedges' method (Borenstein et al., 2011; Cumming, 2012). The conventional adjectives to describe effect size - trivial, small, moderate, large - are used for effect sizes  $g < 0.2$ ,  $g < 0.5$ ,  $g < 0.8$  and  $g > 0.8$  SD respectively (Cumming, 2012).

## **2.5 Synthesis of results**

Meta-analyses of experimental outcomes, including the calculation of weighted mean effect sizes (Hedges'  $g$ ), 95% confidence intervals,  $I^2$  heterogeneity values, and  $P$  values using the random effects model, were performed with the metafor package in R (<http://CRAN.R-project.org/package=metafor>) (Viechtbauer, 2010). All error bars in forest plots are 95% confidence intervals; forest plots were generated with custom R scripts.

## **2.6 Assessment of bias across studies**

Publication bias was assessed with funnel plots and Egger's linear regression test of funnel plot asymmetry (Egger et al., 1997). The standard normal deviate (Hedges'  $g$  / standard error) for each study was regressed against the study's precision ( $1 /$  standard error) using the "lm" function in R (<http://www.R-project.org/>). For studies that showed publication bias ( $P$ -value  $\leq 0.05$ ), the trim-and-fill method (Duval and Tweedie, 2000) was employed to estimate the effects of publication bias on the effect size estimate. Funnel plots and trim-and-fill adjustments were performed with the 'metafor' package in R (Viechtbauer, 2010).

### **3. RESULTS**

#### ***3.1 Review selection criteria identified 306 eligible articles***

The flow-chart in Figure 1 summarizes the study selection process. In total, 1169 articles were identified by the initial search in PubMed and EMBASE databases. According to the selection criteria described above, 498 studies were excluded based on their titles and a further 150 were excluded based on their abstracts. The full text of the remaining 521 articles were screened for criteria related to experimental paradigm, methods, and relevant variables, resulting in the exclusion of a further 215 studies. A total of 306 articles were considered eligible for inclusion in the review.

#### ***3.2 Characteristics of included experiments***

The characteristics of all included studies are given in Table 3. In brief, 582 experiments from 306 studies comprising 411 EPM experiments, 84 OF experiments and 87 LD experiments were identified. Studies were published between 1985 and 2015 and included data from 318 experiments conducted on mice and 264 experiments on rats. Studies reported 515 experiments conducted on male animals, 29 on female, 35 on mixed and 3 experiments with no gender information reported. ARDEB studies of diazepam used a median dosage of 1 mg/kg, with minimum and maximum dosages of 0.01 mg/kg and 20 mg/kg respectively, a dose range is similar to or higher than commonly used by patients.

#### ***3.3 Heterogeneity***

Statistically significant heterogeneity was found in (8/10) of the meta-analyses. Only two meta-analyses had high heterogeneity,  $I^2 > 75\%$ : *Htr1a* overexpression, and physical restraint (Higgins et al., 2003). Three of the meta-analyses, pain and *Htt*

knockouts and diazepam, had moderate heterogeneity ( $50\% < I^2 < 75\%$ ). Five meta-analyses had low heterogeneity ( $I^2 < 50\%$ ). As most of these syntheses contained data from more than one assay type, it is encouraging that half had low or moderate heterogeneity, and outcome that is compatible with the idea that the three ARDEB assays are testing similar aspects of rodent anxiety.

### **3.4 Substantial publication bias in four anxiety factors**

Censorship of non-statistically significant experimental results and selective publication of statistically significant ‘positive’ results can cause a literature (and meta-analysis thereof) to overstate effect sizes. This effect, termed ‘publication bias,’ has a profound influence on the literature on rodent models of stroke, and may affect other animal models (Sena et al., 2010). Publication bias in the ARDEB literature was assessed for the six meta-analyses that had at least 20 experiments (Table 2) (Sterne et al., 2011). Funnel plots of these data showed pronounced asymmetry (Figure 2), which points to publication bias in these literatures (Sterne et al., 2011). Egger’s asymmetry test indicated that four of these literatures showed statistically significant bias (Table 2). For the biased data sets, we applied trim-and-fill adjustment to estimate the number of hypothesized missing studies and to correct the bias (Duval and Tweedie, 2000) (Figure 2). These data support the idea that the literatures of diazepam, *Htt* knockout, social isolation and restraint effects on ARDEB are strongly affected by publication bias.

### **3.5 Diazepam reduces anxiety-related defense behaviors**

Diazepam is an important minor tranquilizer that was used for decades as the first line of treatment for anxiety disorders (Tone, 2009) and, along with other benzodiazepines, is still used extensively to control anxiety (Baldwin et al., 2014). Recent clinical meta-

analysis studies have found support for the efficacy of benzodiazepines in the short-term treatment of anxiety disorders (Baldwin et al., 2014). However, a review of diazepam effects in open field studies revealed widespread disagreement between with 29 studies supporting an anxiolytic effect and 23 supporting either an anxiogenic effect or no effect (Prut and Belzung, 2003). We reviewed the available literature on diazepam for the three major rodent ARDEB assays: EPM, OF and LD. This review identified 172 articles containing relevant data (Assie et al., 1993; Bahi et al., 2014; Barbosa et al., 2008; Baretta et al., 2012; Barnes et al., 1990; Bellavite et al., 2011; Belzung and Agmo, 1997; Bhatt et al., 2013; Bhattacharya and Mitra, 1991; Birkett et al., 2011; Blainski et al., 2010; Borsini et al., 1993; Brioni et al., 1994; Carneiro et al., 2005; Carro-Juarez et al., 2012; Cechin et al., 2003; Cha et al., 2005; Chen et al., 2004; 2005; Choleris et al., 2001; Cole and Rodgers, 1995; Colla et al., 2015; Consoli et al., 2007; Contreras et al., 2011; Costa et al., 2011; Costall et al., 1990; Da Silva et al., 1996; Dalvi and Rodgers, 2001; 1999; de A Vieira et al., 2013; de Almeida et al., 2012; de Castro et al., 2007; de Melo et al., 2006; de Sousa et al., 2007; de-Paris et al., 2000; Drapier et al., 2007; R. W. Dunn et al., 1989; 1998; Ene et al., 2015; Engin et al., 2009; Ennaceur et al., 2010; Fajemiroye et al., 2014; Faria et al., 1997; Faturi et al., 2010; F. Fernandez et al., 2004; S. P. Fernandez et al., 2008; Flores et al., 2006; Fortes et al., 2013; Fraser et al., 2010; Frassetto et al., 2010; Galeotti et al., 2013; Girish et al., 2013; Gomes et al., 2010; Ma Eva Gonzalez-Trujano et al., 2006; Maria Eva Gonzalez-Trujano et al., 2015; González-Pardo et al., 2006; Griebel et al., 1998; 1997; 1999a; 1999b; 2002; Guilloux et al., 2013; Gupta et al., 2014; 2015; Han et al., 2009; Harada et al., 2006; Hasenohrl et al., 1996; Hazim et al., 2014; Huerta-Reyes et al., 2013; Hui et al., 2002; Ishaq, 2014; N. S. Jain et al., 2005; Jastrzebska-Wiesek et al., 2014; Jászberényi et al., 2009; 2007; Jessa et al., 1996; Jones et al., 1994; Kalouda and Pitsikas, 2015;

Karakas et al., 2011; Karim et al., 2011; Kebebew and Shibeshi, 2013; Klodzinska et al., 2004a; 2004b; Kong et al., 2006; Kumar and Bhat, 2014; Kurhe et al., 2014; Kuribara et al., 2000; la Pena et al., 2013; LaBuda and Fuchs, 2001; Langen et al., 2005; Leggio et al., 2011; Lepicard et al., 2000; Jie Liu et al., 2015; Lolli et al., 2007; Mahendra and Bisht, 2011; Mansouri et al., 2014; Martinez et al., 2006; Mechan et al., 2002; Melo et al., 2010; Mesfin et al., 2014; Meyer et al., 2013; Mi et al., 2005; Micale et al., 2009; 2008; Molander et al., 2011; Molina-Hernandez et al., 2004; Mora et al., 2005; Moreira et al., 2014; Nagaraja et al., 2012; Ochoa-Sanchez et al., 2012; Ognibene et al., 2008; Okuyama et al., 1999; Onusic et al., 2002; Pain et al., 1999; Paine et al., 2002; Parent et al., 2012; Pellow et al., 1985; Peng et al., 2004; Pires et al., 2013; Plaznik et al., 1994; Ponten et al., 2011; Popik et al., 2006; Radulovic et al., 2013; Rago et al., 1988; Ramanathan et al., 1998; Raquibul Hasan et al., 2009; Rejon-Orantes et al., 2013; Rex et al., 2002; Rochford et al., 1997; Saiyudthong and Marsden, 2011; Sakaue et al., 2003; Santos Rosa et al., 2012; Satyan et al., 1998; Schmitt et al., 2002; 2001; Sherif et al., 1994; Silva et al., 2007; Simpson and Kelly, 2012; Sorra et al., 2014; Srinivasan et al., 2003; Stankevicius et al., 2008; Stefanski et al., 1992; Steiner et al., 2012; Stemmelin et al., 2008; Sugiyama et al., 2012; Swami et al., 2014; Taiwo et al., 2012; Tanaka et al., 2013; Tatarczynska et al., 2004; Thippeswamy et al., 2011; Thompson et al., 2015; Thongsaard et al., 1996; Tolardo et al., 2010; Varty et al., 2002; Venancio et al., 2011; Volke et al., 1998; Wada and Fukuda, 1991; Wanasuntronwong et al., 2012; Wang et al., 2015; Wesolowska and Nikiforuk, 2007; Wikinski et al., 2001; Wolfman et al., 1994; Yadav et al., 2008; Yamada et al., 2000; Yao et al., 2010; Yasumatsu et al., 1994; Zanolli et al., 2002; L.-M. Zhang et al., 2014; Zheng et al., 2009). Calculation of an average Hedges'  $g$  (Cumming, 2012) for the 386 experiments contained therein indicated that diazepam had a very large effect on ARDEB, with a -

1.26 g [95CI -1.36, -1.17] reduction compared with untreated control animals (Figure 3, Table 2). However, as Egger's regression indicated the source literature was affected by publication bias, trim-and-fill correction indicated a smaller - though still large - effect of -0.85 g [95CI -0.74, -0.96]. The meta-analysis had a moderate level of heterogeneity ( $I^2 = 70.4\%$ ). Subgroup analysis of assay types suggest that assays were not major source of heterogeneity (Figure 3). Additional subgroup analyses of species (rat *versus* mouse) and treatment duration variables revealed that these factors were also only minor sources of heterogeneity (data not shown), indicating that laboratory, dosage, strain and other possible sources of experimental variation likely play a role. As diazepam is universally accepted to be an effective anxiolytic, and it has a robust (bias-corrected) effect in the rodent ARDEB assays, this meta-analytic result verifies the validity of the defense behavior tests.

### **3.6 5-HT1A receptor function influences ARDEB**

Following negative publicity regarding the adverse effects of benzodiazepines (Tone, 2009), pharmaceutical companies focused on the serotonergic system (Griebel and Holmes, 2013). Of the fourteen mammalian serotonergic receptors, much investigation has centered on the serotonin receptor 5-HT1A and its proposed influence on anxiety disorders and depression (Samuels et al., 2014). More than 1200 articles describe experiments connecting 5-HT1A agonism with rodent anxiety (Griebel and Holmes, 2013). However, a substantial proportion of those articles reported that 5-HT1A agonists or knockout of the *Htr1a* gene either produced no effect on anxiety or an effect that was opposite to the receptor's proposed mode of action (Griebel and Holmes, 2013). We systematically reviewed the literature on gene manipulations of *Htr1a* and identified 11 knockout articles (Ferrés-Coy et al., 2013; Freeman-Daniels et al., 2011; Gleason et al., 2010; Groenink et al., 2003; Gross et al., 2002; A. Jain et al.,



2012; Klemenhausen et al., 2006; Parks et al., 1998; Piszczek et al., 2013; Ramboz et al., 1998; Vinkers et al., 2010). Meta-analysis of the knockout data revealed that removal of *Htr1a* produced a moderate increase (Hedges'  $g = 0.73$  [95CI 0.50, 0.96],  $P = 3.5 \times 10^{-10}$ ) in ARDEB phenotypes (Figure 4A). The three studies of *Htr1a* overexpression found by the review (Audero et al., 2013; Bert et al., 2006; Kusserow et al., 2004) indicated that this intervention moderately decreased ARDEB ( $g = -0.6$  [95CI -1.3, 0.13],  $P = 0.11$ ; Figure 4B). The cumulative sample size of *Htr1a* overexpression is quite substantial ( $N = 100, 98$ ), though the moderate effect size observed was not statistically significant and had high heterogeneity ( $I^2 = 80\%$ ). These results confirm that *Htr1a* function has a moderate effect on rodent anxiety.

### **3.7 Anxiotropic effects of the serotonin transporter**

The serotonin transporter (SERT) is the target for the selective serotonin reuptake inhibitors (SSRIs), a class of drugs used to treat depression and anxiety (Baldwin et al., 2014). Meta-analysis of thirteen knockout studies (Carroll et al., 2007; Holmes et al., 2003a; 2003b; Kalueff et al., 2007a; 2007b; Li et al., 2004; Line et al., 2011; Lira et al., 2003; Moya et al., 2011; Olivier et al., 2008; Pang et al., 2011; Schipper et al., 2011; Zhao et al., 2006) revealed a large anxiogenic effect ( $g = 0.88$  [95CI 1.26, 0.23],  $P = 5.2 \times 10^{-14}$ ; Figure 5A) produced by knocking out the SERT gene, *Htt*. However, a funnel plot and Egger's regression revealed a pronounced bias in reported effect sizes (Egger's test  $P = 6.7 \times 10^{-6}$ , Table 2). Trim-and-fill adjustment filled the left segment of the funnel plot with ten imputed data points so as to obtain a symmetric funnel plot, reducing the effect size to  $g = 0.57$  [95CI 0.29, 0.86], a moderate effect. Only two articles studying the effect of *Htt* overexpression on ARDEB were found (Jennings et al., 2006; Line et al., 2011). Meta-analysis revealed a large anxiolytic effect ( $g = -0.94$  [95CI -1.69, -0.20],  $P = 0.013$ ; Figure 5B) in EPM and OF assays (no LD articles were

found). The transporter gene knockout and overexpression effects clearly connect *Htt* function to rodent anxiety. However, the direction of effects is the opposite of what would be expected from the clinical application of SERT inhibitors, given that SSRI reduction of SERT function is believed to have a therapeutic, anxiety-reducing effect.

### **3.8 The effect of acute pain on rodent anxiety**

Environmental stressors have physiological effects on animals that promote the anxiety-like state (van Praag, 2003). To survey a range of stress modalities we selected acute pain, bodily restraint and social isolation for review; all three have been found to promote anxiety in humans (Sherif and Orelund, 1995). The systematic review identified seven papers measuring the effect of acute pain on ARDEB (Benbouzid et al., 2008; Leite-Almeida et al., 2012; Yan Liu et al., 2015; Matsuzawa-Yanagida et al., 2008; Parent et al., 2012; Schellinck et al., 2003; Shang et al., 2014). Meta-analysis of the 21 experiments therein indicated a moderate anxiogenic effect ( $g = 0.56$  [95CI 0.19, 0.93],  $P = 2.9 \times 10^{-3}$ ; Figure 6A).

### **3.9 The effect of bodily restraint on rodent anxiety**

Review of 16 studies of rodent bodily restraint (Anand et al., 2012; Busnardo et al., 2013; Carvajal et al., 2004; Chesworth et al., 2012; Estanislau and Morato, 2005; Granjeiro et al., 2011; Harris et al., 2001; Joshi et al., 2014; Jing Liu et al., 2011; Locchi et al., 2008; Lunga and Herbert, 2004; Nosek et al., 2008; Ouagazzal et al., 2003; D. G. Reis et al., 2011; Rylkova et al., 2009; Walf and Frye, 2012) containing 21 experiments indicated that it had an overall moderate anxiogenic effect in EPM and OF assays ( $g = 0.70$  [ 95% CI 0.82 - 1.32],  $P = 0.027$ ; Figure 6B). The restraint meta-analysis had a high level of heterogeneity,  $I^2 = 89\%$ ; a subgroup analysis by assay type revealed that the different assays were not the source of this variability (data not shown).

### **3.10 Social isolation has a small effect on rodent defense behaviors**

Systematic review identified 50 articles on social isolation and ARDEB (Abramov et al., 2004; Blakley and Pohorecky, 2006; Blednov et al., 2001; Bledsoe et al., 2011; Brenes et al., 2009; Carrier and Kabbaj, 2012; Chappell et al., 2013; Cheeta et al., 2001; Conrad et al., 2011; Cuenya et al., 2012; Da Silva et al., 1996; Das et al., 2014; Djordjevic et al., 2012; Doremus-Fitzwater et al., 2009; Estelles et al., 2007; Fone et al., 1996; Haller and Halász, 1999; Haller et al., 2000; Hermes et al., 2011; Hirani et al., 2005; Imanaka et al., 2008; 2006; Knuth and Etgen, 2007; Koike et al., 2009; Kokare et al., 2010; Lapiz et al., 2001; Leussis and Andersen, 2008; Linge et al., 2013; Xiao Liu et al., 2013; Lukkes et al., 2009; Majercsik et al., 2003; McCool and Chappell, 2009; Moragrega et al., 2003; Pisu et al., 2013; 2011; Pritchard et al., 2008; Quintino-dos-Santos et al., 2014; F. M. C. V. Reis et al., 2012; Rodgers and Cole, 1993; Ryu et al., 2009; Santos et al., 2010; Serra et al., 2000; Thorsell et al., 2006; Voikar et al., 2005; Wei et al., 2007; Workman et al., 2011; Wright and Ingenito, 2001; Yildirim et al., 2012; Yorgason et al., 2013; Y. Zhang et al., 2012). Meta-analysis revealed a small anxiogenic effect ( $g = 0.33$  [95CI 0.21, 0.44],  $P = 3.4 \times 10^{-8}$ ; Figure 6C), but this included likely publication bias; the trim-and-fill method corrected the anxiogenic effect to only  $0.21 g$  [95CI 0.07, 0.34],  $P = 3.1 \times 10^{-3}$ ) a very small anxiotropic effect (Figure 2B). It appears that, unlike the physical stressors, social isolation has only a modest influence on the ARDEB assays.

### **3.11 *Crh* gene knockout has a modest effect on rodent ARDEB**

Several neuropeptide-related genes involved in stress signaling have been linked to anxiety, notably the peptide, corticotropin-releasing hormone (CRH; also known as corticotropin-releasing factor) (Kormos and Gaszner, 2013) and its receptor, CRHR1. Two studies that examined the effects of *Crh* knockouts on ARDEB were found

(Weninger et al., 1999), which revealed only a small effect ( $g = 0.30$  [95CI -0.32, 0.92],  $P = 0.34$ ; Figure 7A). This supports the idea that CRH has only a modest effect on the ARDEB. The meta-analytic result may suffer from insufficient precision as the cumulative sample size was only ( $N = 20, 21$ ). As publication bias appears to affect the literature, this small effect could be an overestimate.

### **3.12 *Crhr1* gene knockout has a large effect on rodent anxiety**

CRH exerts its biological action via two receptors known as CRHR1 and CRHR2. The two receptors are pharmacologically distinct and only the former has been widely studied in the context of anxiety (Owens and Nemeroff, 1991; Paez-Pereda et al., 2011). Meta-analysis (Gammie and Stevenson, 2006; Liebsch et al., 1999; 1995; Müller et al., 2003; Smith et al., 1998; Trimble et al., 2007) found that, in contrast to the *Crh* knockout, deletion of *Crhr1* had a large anxiolytic effect on ARDEB ( $g = -1.0$  [95CI -1.30, -0.70],  $P = 6.64 \times 10^{-11}$ ; Figure 7B). The discordance between *Crh* and *Crhr1* knockout effects has previously been attributed to the action of other peptide ligand(s) of *Crhr1*, either urocortin or another, unidentified ligand (A. J. Dunn and Swiergiel, 1999).

## 4. DISCUSSION

### 4.1 Summary of evidence

Inspection of the forest plots reveals that all of the primary publication sets include experimental effect sizes that are discordant, either in direction (anxiolytic versus anxiogenic) and/or magnitude. The generality of discordance in the literature emphasizes the utility of meta-analysis to behavioral neuroscience to give a quantitative overview and to synthesize the best evidence available. Of ten analyses of putative anxiotropic interventions, eight yielded at least moderate meta-analytic effect sizes and two produced small effect sizes (Figure 9). Of the moderate effect size factors, one (*Htr1a* overexpression) had a non-statistically significant test result. The synthetic data strongly confirm that diazepam, the serotonergic system, environmental stressors, and *Crhr1* influence an anxiety-like process in the mouse brain.

### 4.2 Limitations

This study is limited by its exclusive use of English-language published data. Some studies had to be excluded from the meta-analysis during the full text scan because they did not report measures of variance. Only those studies were selected for meta-analysis which report time or percent time spent in exposed arena could be selected for meta-analysis. We found no knowledge gaps *per se*, as all ten proposed anxiety-related factors had at least two studies. Nevertheless, *Htt* overexpression, *Crh* knockouts and the non-anxiety genes had limited cumulative sample sizes ( $N_{\text{cumulative}} < 64, 64$ ). Of the six factors for which publication bias was examined, three were affected. The presence of publication bias in the larger data sets, suggests that inclusion of further (e.g. unpublished) data to the smaller meta-analyses would be

expected, on average, to lower these effect sizes as well. Heterogeneity was at least moderate ( $I^2 > 50\%$ ) in five of the meta-analyses, indicating that the random effects model is insufficient to explain the variance in these data sets. Thus, laboratory, strain, assay type and other protocol variations played a variable role across factors. Assays could also benefit from increased standardization (Crabbe et al., 1999). Future work will include the implementation of mixed regression models that attempt to account for the unexplained variance (Yildizoglu et al., 2015).

#### **4.3 Disconnects between *Htr1a* and *Crhr1* preclinical results and clinical efforts**

Meta-analysis of *Htr1a* overexpression revealed it has a moderate anxiotropic effect (-0.6 g), smaller than the bias-corrected diazepam effect (-0.85 g), suggesting that compounds aiming to increase 5-HT<sub>1A</sub> function may be a poor strategy to reduce anxiety. This view is supported by clinical meta-analyses that have concluded that drugs targeting 5-HT<sub>1A</sub> - the azapirones - appear inferior to benzodiazepines for generalized anxiety disorder (Chessick et al., 2006) and that there is insufficient evidence to support azapirone use in panic disorder (Imai et al., 2014). It appears that clinical adoption of the azapirones was/is not informed by the preclinical genetic evidence base. A second type of preclinical-clinical disconnect is observed with the *Crhr1* knockouts. The synthetic preclinical data indicate that *Crhr1* knockout produces a very large reduction of rodent anxiety ( $g = -1.0$  [95Ci -0.7, -1.3],  $I^2 = 13\%$ ,  $N_{\text{cumulative}} = 105, 99$ ). However, at least one clinical trial of a CRHR1 antagonist for generalized anxiety disorder showed no benefit over placebo (Coric et al., 2010). The discrepancy between the efficacy of *Crhr1* knockouts and inefficacy of CRHR1 antagonists in patients remains unexplained.

#### **4.4 A paradox in *Htt*-SSRI anxiety effects**

Drugs that inhibit SERT, the SSRIs, are recommended as the first line of pharmacological treatment for anxiety (Baldwin et al., 2014). Blocking SERT-mediated reuptake of serotonin from the synaptic cleft is the proposed mechanism of SSRI anxiety reduction, although rodent studies of chronic SSRI effects on ARDEB have been inconclusive (Griebel and Holmes, 2013; Perez-Caballero et al., 2014). Given the the inhibitors' clinical use, it is surprising that *Htt* knockouts have elevated anxiety relative to controls (0.57 g) and that *Htt* overexpression dramatically reduces rodent anxiety (-0.94 g). The reason for this drug/gene paradox is not clear. In some cases, the authors of the primary *Htt* knockout studies have not discussed it (Carroll et al., 2007; Kalueff et al., 2007a; Moya et al., 2011; Schipper et al., 2011). Other authors have remarked that the underlying reason remains unclear (Holmes et al., 2003b; Lira et al., 2003) or have called the validity of ARDEB assays into doubt (Pang et al., 2011). Others have proposed two explanatory hypotheses. The first is that increased anxiety arises from developmental alterations present in *Htt* knockouts not present in chronically drug-treated animals (Holmes et al., 2003b; Olivier et al., 2008; Zhao et al., 2006). This hypothesis could be tested with conditional knockdown models, i.e. in animals with *Htt* only deleted at the adult stage. While systematic review of PubMed and EMBASE did not identify any published reports of post-developmental *Htt* knockout experiments (e.g., using floxed *Htt*), researchers have analyzed the anxiety-related effects of conditionally ablating the *Pet-1* gene. *Pet-1* is a transcription factor with an expression range that overlaps closely with the expression of *Htt*. In mice with *Pet-1* removed in adulthood, mRNA levels of *Htt* are substantially reduced (Chen Liu et al., 2010). Like *Htt* knockouts, these mice show increased anxiety-like behaviors in multiple ARDEB assays (Chen Liu et al., 2010), eroding confidence in the

developmental alteration hypothesis. A second hypothesis to explain the *Htt*/SSRI paradox is that there is a J-shaped relationship between *Htt* function and anxiety, i.e., both wild-type and knockout animals would have higher anxiety relative to animals with intermediate function (Olivier et al., 2008). The SSRI/knockout paradox is also observed in depression assays, though interfering RNA knockdown of *Htt* in adult mice reduced the forced swim test measure of depression (N = 10, 10) (Thakker et al., 2005).

## 5. Conclusions

This study confirms that diazepam, two environmental stressors and three genes influence rodent anxiety as measured by defense behavior assays. These verified anxiety-related interventions (diazepam, *Htr1a* gene knockout, *Htt* gene knockout, *Htt* gene overexpression, acute pain, restraint and *Crhr1* gene knockout) verify the validity of the ARDEB tests and can be used as reference manipulations when establishing other anxiety models. The rodent anxiety literature is affected by publication bias that amplifies effect sizes. The meta-analytic results bring several preclinical-clinical disconnects into sharp relief: the weakness of *Htr1a* overexpression contrasting with the clinical use of azapirones, the potentially anxiogenic *Crhr1* knockout contrasting with the clinical failure of CRHR1 antagonists, and the anxiogenic SERT knockout contrasting with the clinical use of SSRIs as anxiolytic drugs. Meta-analysis has the ability to aggregate information and resolve discordance in the primary literature, something of particular use to behavioral neuroscience where most primary articles describe experiments with poor precision (Button et al., 2013). Precise estimation of effect magnitudes is important both to better understand animal model strengths/weaknesses and to improve the ability of preclinical studies to guide clinical investigation. The formation of multi-lab consortia to coordinate the examination of important hypothesized anxiety factors would be one promising way to increase the



reliability of rodent anxiety data (Button et al., 2013). New, automated methods of behavioral imaging will also play a role in better preclinical models (Schaefer and Claridge-Chang, 2012). Another possibility would be to use small animal models (worms, flies, and zebrafish) that allow large sample sizes and flexible genetic tools to complement rodent experiments.

### **Author Contributions**

Conceptualization, FM and ACC; Software Programming, JH and FM; Investigation, FM, JH, CLL, JHW, DJJP and BL; Validation, FM, JH, CLL, JHW, DJJP and BL; Data Curation, FM; Writing – Original Draft, FM, JH and ACC; Writing – Review & Editing, ACC; Visualization, FM, JH and ACC; Supervision, ACC; Project Administration, ACC; Funding Acquisition, ACC. All authors have agreed to the final content.

### **Funding Information**

The authors were supported by Biomedical Research Council block grants to the Neuroscience Research Partnership and the Institute of Molecular and Cell Biology. FM and ACC also received support from Duke-NUS Graduate Medical School. JH received support from the A\*STAR Graduate Academy. ACC received additional support from a Nuffield Department of Medicine Fellowship, a Wellcome Trust block grant to the University of Oxford, A\*STAR Joint Council Office grant 1231AFG030 and NARSAD Young Investigator Award 17741. The funders had no role in study design, data collection and analysis, decision to publish, or preparation of the manuscript.

## REFERENCES

- Abramov, U., Raud, S., Kõks, S., Innos, J., Kurrikoff, K., Matsui, T., Vasar, E., 2004. Targeted mutation of CCK(2) receptor gene antagonises behavioural changes induced by social isolation in female, but not in male mice. *Behav Brain Res* 155, 1–11. doi:10.1016/j.bbr.2004.03.027
- Anand, R., Gulati, K., Ray, A., 2012. Pharmacological evidence for the role of nitric oxide in the modulation of stress-induced anxiety by morphine in rats. *Eur J Pharmacol* 676, 71–74. doi:10.1016/j.ejphar.2011.11.032
- Assie, M.B., Chopin, P., Stenger, A., Palmier, C., Briley, M., 1993. Neuropharmacology of a new potential anxiolytic compound, F 2692, 1-(3'-trifluoromethyl phenyl) 1,4-dihydro 3-amino 4-oxo 6-methyl pyridazine. 1. Acute and in vitro effects. *Psychopharmacology (Berl)* 110, 13–18.
- Audero, E., Mlinar, B., Baccini, G., Skachokova, Z.K., Corradetti, R., Gross, C., 2013. Suppression of serotonin neuron firing increases aggression in mice. *J Neurosci* 33, 8678–8688. doi:10.1523/JNEUROSCI.2067-12.2013
- Bahi, A., Schwed, J.S., Walter, M., Stark, H., Sadek, B., 2014. Anxiolytic and antidepressant-like activities of the novel and potent non-imidazole histamine H(3) receptor antagonist ST-1283. *Drug Des Devel Ther* 8, 627–637.
- Baldwin, D.S., Anderson, I.M., Nutt, D.J., Allgulander, C., Bandelow, B., Boer, den, J.A., Christmas, D.M., Davies, S., Fineberg, N., Lidbetter, N., Malizia, A., McCrone, P., Nabarro, D., O'Neill, C., Scott, J., van der Wee, N., Wittchen, H.-U., 2014. Evidence-based pharmacological treatment of anxiety disorders, post-traumatic stress disorder and obsessive-compulsive disorder: A revision of the 2005 guidelines from the British

Association for Psychopharmacology. *J Psychopharmacol (Oxford)* 28, 403–439.

doi:10.1177/0269881114525674

Barbosa, P.R., Valvassori, S.S., Bordignon, C.L.J., Kappel, V.D., Martins, M.R., Gavioli, E.C., Quevedo, J., Reginatto, F.H., 2008. The aqueous extracts of *Passiflora alata* and *Passiflora edulis* reduce anxiety-related behaviors without affecting memory process in rats. *J Med Food* 11, 282–288. doi:10.1089/jmf.2007.722

Baretta, I.P., Felizardo, R.A., Bimbato, V.F., Santos, dos, M.G.J., Kassuya, C.A.L., Gasparotto Junior, A., da Silva, C.R., de Oliveira, S.M., Ferreira, J., Andreatini, R., 2012. Anxiolytic-like effects of acute and chronic treatment with *Achillea millefolium* L. extract. *J Ethnopharmacol* 140, 46–54. doi:10.1016/j.jep.2011.11.047

Barnes, N.M., Costall, B., Kelly, M.E., Onaivi, E.S., Naylor, R.J., 1990. Ketotifen and its analogues reduce aversive responding in the rodent. *Pharmacol Biochem Behav* 37, 785–793.

Bellavite, P., Magnani, P., Zanolin, E., Conforti, A., 2011. Homeopathic Doses of *Gelsemium sempervirens* Improve the Behavior of Mice in Response to Novel Environments. *Evid Based Complement Alternat Med* 2011, 362517.

Belzung, C., Agmo, A., 1997. Naloxone blocks anxiolytic-like effects of benzodiazepines in Swiss but not in Balb/c mice. *Psychopharmacology (Berl)* 132, 195–201.

Benbouzid, M., Pallage, V., Rajalu, M., Waltisperger, E., Doridot, S., Poisbeau, P., Freund-Mercier, M.J., Barrot, M., 2008. Sciatic nerve cuffing in mice: a model of sustained neuropathic pain. *Eur J Pain* 12, 591–599. doi:10.1016/j.ejpain.2007.10.002

Bert, B., Fink, H., Hörtnagl, H., Veh, R.W., Ben Davies, Theuring, F., Kusserow, H., 2006. Mice over-expressing the 5-HT(1A) receptor in cortex and dentate gyrus display exaggerated locomotor and hypothermic response to 8-OH-DPAT. *Behav Brain Res* 167, 328–341. doi:10.1016/j.bbr.2005.09.020

- Bhatt, S., Mahesh, R., Devadoss, T., Jindal, A.K., 2013. Anxiolytic-like effect of (4-benzylpiperazin-1-yl)(3-methoxyquinoxalin-2-yl)methanone (6g) in experimental mouse models of anxiety. *Indian J Pharmacol* 45, 248–251.
- Bhattacharya, S.K., Mitra, S.K., 1991. Anxiolytic activity of *Panax ginseng* roots: an experimental study. *J Ethnopharmacol* 34, 87–92.
- Birkett, M.A., Shinday, N.M., Kessler, E.J., Meyer, J.S., Ritchie, S., Rowlett, J.K., 2011. Acute anxiogenic-like effects of selective serotonin reuptake inhibitors are attenuated by the benzodiazepine diazepam in BALB/c mice. *Pharmacol Biochem Behav* 98, 544–551. doi:10.1016/j.pbb.2011.03.006
- Blainski, A., Piccolo, V.K., Mello, J.C.P., de Oliveira, R.M.W., 2010. Dual effects of crude extracts obtained from *Petiveria alliacea* L. (Phytolaccaceae) on experimental anxiety in mice. *J Ethnopharmacol* 128, 541–544. doi:10.1016/j.jep.2010.01.012
- Blakley, G., Pohorecky, L.A., 2006. Psychosocial stress alters ethanol's effect on open field behaviors. *Pharmacol Biochem Behav* 84, 51–61. doi:10.1016/j.pbb.2006.04.005
- Blednov, Y.A., Stoffel, M., Chang, S.R., Harris, R.A., 2001. GIRK2 deficient mice. Evidence for hyperactivity and reduced anxiety. *Physiol Behav* 74, 109–117.
- Bledsoe, A.C., Oliver, K.M., Scholl, J.L., Forster, G.L., 2011. Anxiety states induced by post-weaning social isolation are mediated by CRF receptors in the dorsal raphe nucleus. *Brain Res Bull* 85, 117–122. doi:10.1016/j.brainresbull.2011.03.003
- Borenstein, M., Hedges, L.V., Higgins, J., Rothstein, H.R., 2011. Introduction to meta-analysis. John Wiley & Sons, Ltd.
- Borsini, F., Brambilla, A., Cesana, R., Donetti, A., 1993. The effect of DAU 6215, a novel 5HT-3 antagonist, in animal models of anxiety. *Pharmacol Res* 27, 151–164. doi:10.1006/phrs.1993.1015
- Brenes, J.C., Padilla, M., Fornaguera, J., 2009. A detailed analysis of open-field habituation

- and behavioral and neurochemical antidepressant-like effects in postweaning enriched rats. *Behav Brain Res* 197, 125–137. doi:10.1016/j.bbr.2008.08.014
- Brioni, J.D., O'Neill, A.B., Kim, D.J., Buckley, M.J., Decker, M.W., Arneric, S.P., 1994. Anxiolytic-like effects of the novel cholinergic channel activator ABT-418. *J Pharmacol Exp Ther* 271, 353–361.
- Busnardo, C., Alves, F.H.F., Crestani, C.C., Scopinho, A.A., Resstel, L.B.M., Corrêa, F.M.A., 2013. Paraventricular nucleus of the hypothalamus glutamate neurotransmission modulates autonomic, neuroendocrine and behavioral responses to acute restraint stress in rats. *Eur Neuropsychopharmacol* 23, 1611–1622. doi:10.1016/j.euroneuro.2012.11.002
- Button, K.S., Ioannidis, J.P.A., Mokrysz, C., Nosek, B.A., Flint, J., Robinson, E.S.J., Munafò, M.R., 2013. Power failure: why small sample size undermines the reliability of neuroscience. *Nat Rev Neurosci* 14, 365–376. doi:10.1038/nrn3475
- Carneiro, L.M.V., Diogenes, J.P.L., Vasconcelos, S.M.M., Aragao, G.F., Noronha, E.C., Gomes, P.B., Viana, G.S.B., 2005. Behavioral and neurochemical effects on rat offspring after prenatal exposure to ethanol. *Neurotoxicol Teratol* 27, 585–592. doi:10.1016/j.ntt.2005.06.006
- Carrier, N., Kabbaj, M., 2012. Testosterone and imipramine have antidepressant effects in socially isolated male but not female rats. *Horm Behav* 61, 678–685. doi:10.1016/j.yhbeh.2012.03.001
- Carro-Juarez, M., Rodriguez-Landa, J.F., Rodriguez-Pena, M. de L., Rovirosa-Hernandez, M. de J., Garcia-Orduna, F., 2012. The aqueous crude extract of *Montanoa frutescens* produces anxiolytic-like effects similarly to diazepam in Wistar rats: involvement of GABAA receptor. *J Ethnopharmacol* 143, 592–598. doi:10.1016/j.jep.2012.07.022
- Carroll, J.C., Boyce-Rustay, J.M., Millstein, R., Yang, R., Wiedholz, L.M., Murphy, D.L.,

- Holmes, A., 2007. Effects of mild early life stress on abnormal emotion-related behaviors in 5-HTT knockout mice. *Behav Genet* 37, 214–222. doi:10.1007/s10519-006-9129-9
- Carvajal, C.C., Vercauteren, F., Dumont, Y., Michalkiewicz, M., Quirion, R., 2004. Aged neuropeptide Y transgenic rats are resistant to acute stress but maintain spatial and non-spatial learning. *Behav Brain Res* 153, 471–480. doi:10.1016/j.bbr.2004.01.004
- Cechin, E.M., Quevedo, J., Barichello, T., Machado-Vieira, R., Gentil, V., Kapczinski, F., 2003. Dose-related effects of propericiazine in rats. *Braz J Med Biol Res* 36, 227–231.
- Cha, H.-Y., Park, J.-H., Hong, J.T., Yoo, H.-S., Song, S., Hwang, B.-Y., Eun, J.-S., Oh, K.-W., 2005. Anxiolytic-like effects of ginsenosides on the elevated plus-maze model in mice. *Biol Pharm Bull* 28, 1621–1625.
- Chappell, A.M., Carter, E., McCool, B.A., Weiner, J.L., 2013. Adolescent rearing conditions influence the relationship between initial anxiety-like behavior and ethanol drinking in male Long Evans rats. *Alcohol Clin Exp Res* 37 Suppl 1, E394–403. doi:10.1111/j.1530-0277.2012.01926.x
- Cheeta, S., Irvine, E., File, S.E., 2001. Social isolation modifies nicotine's effects in animal tests of anxiety. *Br J Pharmacol* 132, 1389–1395. doi:10.1038/sj.bjp.0703991
- Chen, S.W., Kong, W.X., Zhang, Y.J., Li, Y.L., Mi, X.J., Mu, X.S., 2004. Possible anxiolytic effects of taurine in the mouse elevated plus-maze. *Life Sci.* 75, 1503–1511. doi:10.1016/j.lfs.2004.03.010
- Chen, S.W., Mi, X.J., Wang, R., Wang, W.J., Kong, W.X., Zhang, Y.J., Li, Y.L., 2005. Behavioral effects of sinomenine in murine models of anxiety. *Life Sci.* 78, 232–238. doi:10.1016/j.lfs.2005.04.056
- Chessick, C.A., Allen, M.H., Thase, M., Batista Miralha da Cunha, A.B.C., Kapczinski, F.F.K., de Lima, M.S.M.L., Santos Souza, dos, J.J.S.S., 2006. Azapirones for

- generalized anxiety disorder. Cochrane database of systematic reviews (Online)  
CD006115. doi:10.1002/14651858.CD006115
- Chesworth, R., Yulyaningsih, E., Cappas, E., Arnold, J., Sainsbury, A., Karl, T., 2012. The response of neuregulin 1 mutant mice to acute restraint stress. *Neurosci Lett* 515, 82–86. doi:10.1016/j.neulet.2012.03.024
- Choleris, E., Thomas, A.W., Kavaliers, M., Prato, F.S., 2001. A detailed ethological analysis of the mouse open field test: effects of diazepam, chlordiazepoxide and an extremely low frequency pulsed magnetic field. *Neurosci Biobehav Rev* 25, 235–260.
- Cole, J.C., Rodgers, R.J., 1995. Ethological comparison of the effects of diazepam and acute/chronic imipramine on the behaviour of mice in the elevated plus-maze. *Pharmacol Biochem Behav* 52, 473–478.
- Colla, A.R.S., Rosa, J.M., Cunha, M.P., Rodrigues, A.L.S., 2015. Anxiolytic-like effects of ursolic acid in mice. *Eur J Pharmacol* 758, 171–176. doi:10.1016/j.ejphar.2015.03.077
- Conrad, K.L., Louderback, K.M., Gessner, C.P., Winder, D.G., 2011. Stress-induced alterations in anxiety-like behavior and adaptations in plasticity in the bed nucleus of the stria terminalis. *Physiol Behav* 104, 248–256. doi:10.1016/j.physbeh.2011.03.001
- Consoli, D., Leggio, G.M., Mazzola, C., Micale, V., Drago, F., 2007. Behavioral effects of the beta3 adrenoceptor agonist SR58611A: is it the putative prototype of a new class of antidepressant/anxiolytic drugs? *Eur J Pharmacol* 573, 139–147.  
doi:10.1016/j.ejphar.2007.06.048
- Contreras, C.M., Rodriguez-Landa, J.F., Gutierrez-Garcia, A.G., Mendoza-Lopez, M.R., Garcia-Rios, R.I., Cueto-Escobedo, J., 2011. Anxiolytic-like effects of human amniotic fluid and its fatty acids in Wistar rats. *Behav Pharmacol* 22, 655–662.
- Coric, V., Feldman, H.H., Oren, D.A., Shekhar, A., Pultz, J., Dockens, R.C., Wu, X., Gentile, K.A., Huang, S.-P., Emison, E., Delmonte, T., D'Souza, B.B., Zimbroff, D.L., Grebb,



- J.A., Goddard, A.W., Stock, E.G., 2010. Multicenter, randomized, double-blind, active comparator and placebo-controlled trial of a corticotropin-releasing factor receptor-1 antagonist in generalized anxiety disorder. *Depress Anxiety* 27, 417–425.  
doi:10.1002/da.20695
- Costa, C.A.R. de A., Kohn, D.O., de Lima, V.M., Gargano, A.C., Flório, J.C., Costa, M., 2011. The GABAergic system contributes to the anxiolytic-like effect of essential oil from *Cymbopogon citratus* (lemongrass). *J Ethnopharmacol* 137, 828–836.  
doi:10.1016/j.jep.2011.07.003
- Costall, B., Domeney, A.M., Gerrard, P.A., Horovitz, Z.P., Kelly, M.E., Naylor, R.J., Tomkins, D.M., 1990. Effects of captopril and SQ29,852 on anxiety-related behaviours in rodent and marmoset. *Pharmacol Biochem Behav* 36, 13–20.
- Crabbe, J.C., Wahlsten, D., Dudek, B.C., 1999. Genetics of mouse behavior: interactions with laboratory environment. *Science* 284, 1670–1672.
- Crawley, J., Goodwin, F.K., 1980. Preliminary report of a simple animal behavior model for the anxiolytic effects of benzodiazepines. *Pharmacol Biochem Behav* 13, 167–170.
- Cuenya, L., Fosacheca, S., Mustaca, A., Kamenetzky, G., 2012. Effects of isolation in adulthood on frustration and anxiety. *Behav Processes* 90, 155–160.  
doi:10.1016/j.beproc.2012.01.003
- Cumming, G., 2012. *Understanding the New Statistics: Effect Sizes, Confidence Intervals, and Meta-Analysis*, Multivariate Applications Series.
- Da Silva, N.L., Ferreira, V.M., Carobrez, A. de P., Morato, G.S., 1996. Individual housing from rearing modifies the performance of young rats on the elevated plus-maze apparatus. *Physiol Behav* 60, 1391–1396.
- Dalvi, A., Rodgers, R.J., 2001. Anxiolytic effects of valproate and diazepam in mice are differentially sensitive to picrotoxin antagonism. *Pharmacol Biochem Behav* 68, 23–32.

- Dalvi, A., Rodgers, R.J., 1999. Behavioral effects of diazepam in the murine plus-maze: flumazenil antagonism of enhanced head dipping but not the disinhibition of open-arm avoidance. *Pharmacol Biochem Behav* 62, 727–734.
- Darwin, C., 1998. *The Expression of the Emotions in Man and Animals*. Project Gutenberg.
- Das, S.K., Barhwal, K., Hota, S.K., Thakur, M.K., Srivastava, R.B., 2014. Disrupting monotony during social isolation stress prevents early development of anxiety and depression like traits in male rats. *BMC Neurosci* 16, 2–2. doi:10.1186/s12868-015-0141-y
- de A Vieira, L.F., S Reis, dos, M.D., Brandão, A.R.A., Viana, I.M.M.N., da Silva, J.P., Barreto, E., Smaniotto, S., 2013. Anxiolytic-like effect of the extract from *Bowdichia virgilioides* in mice. *Revista Brasileira de Farmacognosia* 23, 680–686. doi:10.1590/S0102-695X2013005000044
- de Almeida, A.A.C., Costa, J.P., de Carvalho, R.B.F., de Sousa, D.P., de Freitas, R.M., 2012. Evaluation of acute toxicity of a natural compound (+)-limonene epoxide and its anxiolytic-like action. *Brain Res* 1448, 56–62. doi:10.1016/j.brainres.2012.01.070
- de Castro, P.C.F., Hoshino, A., da Silva, J.C., Mendes, F.R., 2007. Possible anxiolytic effect of two extracts of *Passiflora quadrangularis* L. in experimental models. *Phytother Res* 21, 481–484. doi:10.1002/ptr.2079
- de Melo, C.T.V., Monteiro, A.P., Leite, C.P., de Araujo, F.L.O., Lima, V.T.M., Barbosa-Filho, J.M., de Franca Fonteles, M.M., de Vasconcelos, S.M.M., de Barros Viana, G.S., de Sousa, F.C.F., 2006. Anxiolytic-like effects of (O-methyl)-N-2,6-dihydroxybenzoyl-tyramine (riparin III) from *Aniba riparia* (Nees) Mez (Lauraceae) in mice. *Biol Pharm Bull* 29, 451–454.
- de Sousa, F.C.F., Leite, C.P., de Melo, C.T.V., de Araujo, F.L.O., Gutierrez, S.J.C., Barbosa-Filho, J.M., Fonteles, M.M. de F., de Vasconcelos, S.M.M., de Barros Viana, G.S., 2007.

- Evaluation of effects of N-(2-hydroxybenzoyl) tyramine (riparin II) from *Aniba riparia* (NEES) MEZ (Lauracea) in anxiety models in mice. *Biol Pharm Bull* 30, 1212–1216.
- de-Paris, F., Busnello, J.V., Vianna, M.R., Salgueiro, J.B., Quevedo, J., Izquierdo, I., Kapczinski, F., 2000. The anticonvulsant compound gabapentin possesses anxiolytic but not amnesic effects in rats. *Behav Pharmacol* 11, 169–173.
- DiLuca, M., Olesen, J., 2014. The Cost of Brain Diseases: A Burden or a Challenge? *Neuron* 82, 1205–1208. doi:10.1016/j.neuron.2014.05.044
- Djordjevic, J., Djordjevic, A., Adzic, M., Radojicic, M.B., 2012. Effects of chronic social isolation on Wistar rat behavior and brain plasticity markers. *Neuropsychobiology* 66, 112–119. doi:10.1159/000338605
- Doremus-Fitzwater, T.L., Varlinskaya, E.I., Spear, L.P., 2009. Effects of pretest manipulation on elevated plus-maze behavior in adolescent and adult male and female Sprague-Dawley rats. *Pharmacol Biochem Behav* 92, 413–423. doi:10.1016/j.pbb.2009.01.006
- Drapier, D., Bentue-Ferrer, D., Laviolle, B., Millet, B., Allain, H., Bourin, M., Reymann, J.-M., 2007. Effects of acute fluoxetine, paroxetine and desipramine on rats tested on the elevated plus-maze. *Behav Brain Res* 176, 202–209. doi:10.1016/j.bbr.2006.10.002
- Dunn, A.J., Swiergiel, A.H., 1999. Behavioral responses to stress are intact in CRF-deficient mice. *Brain Res* 845, 14–20.
- Dunn, R.W., Corbett, R., Fielding, S., 1989. Effects of 5-HT<sub>1A</sub> receptor agonists and NMDA receptor antagonists in the social interaction test and the elevated plus maze. *Eur J Pharmacol* 169, 1–10.
- Dunn, R.W., Reed, T.A., Copeland, P.D., Frye, C.A., 1998. The nitric oxide synthase inhibitor 7-nitroindazole displays enhanced anxiolytic efficacy without tolerance in rats following subchronic administration. *Neuropharmacology* 37, 899–904.
- Duval, S., Tweedie, R., 2000. Trim and fill: A simple funnel-plot-based method of testing

- and adjusting for publication bias in meta-analysis. *Biometrics* 56, 455–463.
- Egger, M., Davey Smith, G., Schneider, M., Minder, C., 1997. Bias in meta-analysis detected by a simple, graphical test. *BMJ* 315, 629–634.
- Ene, H.M., Kara, N.Z., Barak, N., Reshef Ben-Mordechai, T., Einat, H., 2015. Effects of repeated asenapine in a battery of tests for anxiety-like behaviours in mice. *Acta Neuropsychiatr* 1–7. doi:10.1017/neu.2015.53
- Engin, E., Treit, D., Dickson, C.T., 2009. Anxiolytic- and antidepressant-like properties of ketamine in behavioral and neurophysiological animal models. *Neuroscience* 161, 359–369. doi:10.1016/j.neuroscience.2009.03.038
- Ennaceur, A., Michalikova, S., van Rensburg, R., Chazot, P.L., 2010. Distinguishing anxiolysis and hyperactivity in an open space behavioral test. *Behav Brain Res* 207, 84–98. doi:10.1016/j.bbr.2009.09.042
- Estanislau, C., Morato, S., 2005. Prenatal stress produces more behavioral alterations than maternal separation in the elevated plus-maze and in the elevated T-maze. *Behav Brain Res* 163, 70–77. doi:10.1016/j.bbr.2005.04.003
- Estelles, J., Lluch, J., Rodriguez-Arias, M., Aguilar, M.A., Minarro, J., 2007. Cocaine exposure during adolescence affects anxiety in adult mice. *Brain Res Bull* 71, 393–403. doi:10.1016/j.brainresbull.2006.10.008
- Fajemiroye, J.O., Galdino, P.M., Florentino, I.F., Da Rocha, F.F., Ghedini, P.C., Polepally, P.R., Zjawiony, J.K., Costa, E.A., 2014. Plurality of anxiety and depression alteration mechanism by oleanolic acid. *J Psychopharmacol (Oxford)* 28, 923–934. doi:10.1177/0269881114536789
- Faria, M.S., Muscará, M.N., Moreno Júnior, H., Teixeira, S.A., Dias, H.B., De Oliveira, B., Graeff, F.G., De Nucci, G., 1997. Acute inhibition of nitric oxide synthesis induces anxiolysis in the plus maze test. *Eur J Pharmacol* 323, 37–43.

- Faturi, C.B., Leite, J.R., Alves, P.B., Canton, A.C., Teixeira-Silva, F., 2010. Anxiolytic-like effect of sweet orange aroma in Wistar rats. *Prog Neuropsychopharmacol Biol Psychiatry* 34, 605–609. doi:10.1016/j.pnpbp.2010.02.020
- Fernandez, F., Misilmeri, M.A., Felger, J.C., Devine, D.P., 2004. Nociceptin/orphanin FQ increases anxiety-related behavior and circulating levels of corticosterone during neophobic tests of anxiety. *Neuropsychopharmacology* 29, 59–71. doi:10.1038/sj.npp.1300308
- Fernandez, S.P., Mewett, K.N., Hanrahan, J.R., Chebib, M., Johnston, G.A.R., 2008. Flavan-3-ol derivatives are positive modulators of GABA(A) receptors with higher efficacy for the alpha(2) subtype and anxiolytic action in mice. *Neuropharmacology* 55, 900–907. doi:10.1016/j.neuropharm.2008.06.069
- Ferrés-Coy, A., Santana, N., Castañé, A., Cortés, R., Carmona, M.C., Toth, M., Montefeltro, A., Artigas, F., Bortolozzi, A., 2013. Acute 5-HT(1)A autoreceptor knockdown increases antidepressant responses and serotonin release in stressful conditions. *Psychopharmacology (Berl)* 225, 61–74. doi:10.1007/s00213-012-2795-9
- Flores, J.A., Galan-Rodriguez, B., Ramiro-Fuentes, S., Fernandez-Espejo, E., 2006. Role for dopamine neurons of the rostral linear nucleus and periaqueductal gray in the rewarding and sensitizing properties of heroin. *Neuropsychopharmacology* 31, 1475–1488. doi:10.1038/sj.npp.1300946
- Fone, K.C., Shalders, K., Fox, Z.D., Arthur, R., Marsden, C.A., 1996. Increased 5-HT<sub>2C</sub> receptor responsiveness occurs on rearing rats in social isolation. *Psychopharmacology (Berl)* 123, 346–352.
- Fortes, A.C., Almeida, A.A.C., Mendonca-Junior, F.J.B., Freitas, R.M., Soares-Sobrinho, J.L., La Roca Soares, de, M.F., 2013. Anxiolytic properties of new chemical entity, 5TIO1. *Neurochem Res* 38, 726–731. doi:10.1007/s11064-013-0970-y

- Fraser, L.M., Brown, R.E., Hussin, A., Fontana, M., Whittaker, A., O'Leary, T.P., Lederle, L., Holmes, A., Ramos, A., 2010. Measuring anxiety- and locomotion-related behaviours in mice: a new way of using old tests. *Psychopharmacology (Berl)* 211, 99–112.  
doi:10.1007/s00213-010-1873-0
- Frassetto, S.S., Alves, I.O., Santos, M.M., Schmidt, A.E.S., Lopes, J.J., Oliveira, P.A., Vinagre, A.S., Pereira, P., 2010. Absence of sibutramine effect on spontaneous anxiety in rats. *Arq Bras Endocrinol Metabol* 54, 375–380.
- Freeman-Daniels, E., Beck, S.G., Kirby, L.G., 2011. Cellular correlates of anxiety in CA1 hippocampal pyramidal cells of 5-HT1A receptor knockout mice. *Psychopharmacology (Berl)* 213, 453–463. doi:10.1007/s00213-010-2030-5
- Galeotti, N., Sanna, M.D., Ghelardini, C., 2013. Pleiotropic effect of histamine H4 receptor modulation in the central nervous system. *Neuropharmacology* 71, 141–147.  
doi:10.1016/j.neuropharm.2013.03.026
- Gammie, S.C., Stevenson, S.A., 2006. Intermale aggression in corticotropin-releasing factor receptor 1 deficient mice. *Behav Brain Res* 171, 63–69. doi:10.1016/j.bbr.2006.03.017
- Girish, C., Raj, V., Arya, J., Balakrishnan, S., 2013. Involvement of the GABAergic system in the anxiolytic-like effect of the flavonoid ellagic acid in mice. *Eur J Pharmacol* 710, 49–58. doi:10.1016/j.ejphar.2013.04.003
- Gleason, G., Liu, B., Bruening, S., Zupan, B., Auerbach, A., Mark, W., Oh, J.E., Gal-Toth, J., Lee, F., Toth, M., 2010. The serotonin1A receptor gene as a genetic and prenatal maternal environmental factor in anxiety. *Proc Natl Acad Sci USA* 107, 7592–7597.  
doi:10.1073/pnas.0914805107
- Gomes, P.B., Feitosa, M.L., Silva, M.I.G., Noronha, E.C., Moura, B.A., Venancio, E.T., Rios, E.R.V., de Sousa, D.P., de Vasconcelos, S.M.M., Fonteles, M.M. de F., de Sousa, F.C.F., 2010. Anxiolytic-like effect of the monoterpene 1,4-cineole in mice. *Pharmacol*

- Biochem Behav 96, 287–293. doi:10.1016/j.pbb.2010.05.019
- Gonzalez-Trujano, Ma Eva, Martinez, A.L., Reyes-Ramirez, A., Reyes-Trejo, B., Navarrete, A., 2006. Palmitone isolated from *Annona diversifolia* induces an anxiolytic-like effect in mice. *Planta Med* 72, 703–707. doi:10.1055/s-2006-931598
- Gonzalez-Trujano, Maria Eva, Ponce-Munoz, H., Hidalgo-Figueroa, S., Navarrete-Vazquez, G., Estrada-Soto, S., 2015. Depressant effects of *Agastache mexicana* methanol extract and one of major metabolites tilianin. *Asian Pac J Trop Med* 8, 185–190. doi:10.1016/S1995-7645(14)60312-6
- González-Pardo, H., Conejo, N.M., Arias, J.L., 2006. Oxidative metabolism of limbic structures after acute administration of diazepam, alprazolam and zolpidem. *Prog Neuropsychopharmacol Biol Psychiatry* 30, 1020–1026. doi:10.1016/j.pnpbp.2006.03.026
- Granjeiro, E.M., Gomes, F.V., Guimarães, F.S., Corrêa, F.M.A., Resstel, L.B.M., 2011. Effects of intracisternal administration of cannabidiol on the cardiovascular and behavioral responses to acute restraint stress. *Pharmacol Biochem Behav* 99, 743–748. doi:10.1016/j.pbb.2011.06.027
- Griebel, G., Holmes, A., 2013. 50 years of hurdles and hope in anxiolytic drug discovery. *Nat Rev Drug Discov* 12, 667–687. doi:10.1038/nrd4075
- Griebel, G., Perrault, G., Sanger, D.J., 1998. Characterization of the behavioral profile of the non-peptide CRF receptor antagonist CP-154,526 in anxiety models in rodents. Comparison with diazepam and buspirone. *Psychopharmacology (Berl)* 138, 55–66.
- Griebel, G., Perrault, G., Sanger, D.J., 1997. CCK receptor antagonists in animal models of anxiety: comparison between exploration tests, conflict procedures and a model based on defensive behaviours. *Behav Pharmacol* 8, 549–560.
- Griebel, G., Perrault, G., Tan, S., Schoemaker, H., Sanger, D.J., 1999a. Comparison of the

- pharmacological properties of classical and novel BZ-omega receptor ligands. *Behav Pharmacol* 10, 483–495.
- Griebel, G., Perrault, G., Tan, S., Schoemaker, H., Sanger, D.J., 1999b. Pharmacological studies on synthetic flavonoids: comparison with diazepam. *Neuropharmacology* 38, 965–977.
- Griebel, G., Simiand, J., Steinberg, R., Jung, M., Gully, D., Roger, P., Geslin, M., Scatton, B., Maffrand, J.-P., Soubrie, P., 2002. 4-(2-Chloro-4-methoxy-5-methylphenyl)-N-[(1S)-2-cyclopropyl-1-(3-fluoro-4-methylphenyl)ethyl]5-methyl-N-(2-propynyl)-1, 3-thiazol-2-amine hydrochloride (SSR125543A), a potent and selective corticotrophin-releasing factor(1) receptor antagonist. II. Characterization in rodent models of stress-related disorders. *J Pharmacol Exp Ther* 301, 333–345.
- Groenink, L., Pattij, T., De Jongh, R., Van der Gugten, J., Oosting, R.S., Dirks, A., Olivier, B., 2003. 5-HT<sub>1A</sub> receptor knockout mice and mice overexpressing corticotropin-releasing hormone in models of anxiety. *Eur J Pharmacol* 463, 185–197. doi:10.1016/S0014-2999(03)01281-0
- Gross, C., Zhuang, X., Stark, K., Ramboz, S., Oosting, R., Kirby, L., Santarelli, L., Beck, S., Hen, R., 2002. Serotonin<sub>1A</sub> receptor acts during development to establish normal anxiety-like behaviour in the adult. *Nature* 416, 396–400. doi:10.1038/416396a
- Guilloux, J.-P., Mendez-David, I., Pehrson, A., Guiard, B.P., Repérant, C., Orvoen, S., Gardier, A.M., Hen, R., Ebert, B., Miller, S., Sanchez, C., David, D.J., 2013. Antidepressant and anxiolytic potential of the multimodal antidepressant vortioxetine (Lu AA21004) assessed by behavioural and neurogenesis outcomes in mice. *Neuropharmacology* 73, 147–159. doi:10.1016/j.neuropharm.2013.05.014
- Gupta, D., Radhakrishnan, M., Kurhe, Y., 2014. Anxiolytic-like effects of alverine citrate in experimental mouse models of anxiety. *Eur J Pharmacol* 742, 94–101.



doi:10.1016/j.ejphar.2014.08.033

Gupta, D., Radhakrishnan, M., Thangaraj, D., Kurhe, Y., 2015. Pharmacological evaluation of novel 5-HT<sub>3</sub> receptor antagonist, QCM-13 (N-cyclohexyl-3-methoxyquinoxalin-2-carboxamide) as anti-anxiety agent in behavioral test battery. *J Pharm Bioallied Sci* 7, 103–108.

Haller, J., Halász, J., 1999. Mild social stress abolishes the effects of isolation on anxiety and chlordiazepoxide reactivity. *Psychopharmacology (Berl)* 144, 311–315.

Haller, J., Halász, J., Makara, G.B., 2000. Housing conditions and the anxiolytic efficacy of buspirone: the relationship between main and side effects. *Behav Pharmacol* 11, 403–412.

Han, H., Ma, Y., Eun, J.-S., Li, R., Hong, J.T., Lee, M.-K., Oh, K.-W., 2009. Anxiolytic-like effects of sanjoinine A isolated from *Zizyphi Spinosi Semen*: possible involvement of GABAergic transmission. *Pharmacol Biochem Behav* 92, 206–213.

doi:10.1016/j.pbb.2008.11.012

Harada, K., Aota, M., Inoue, T., Matsuda, R., Mihara, T., Yamaji, T., Ishibashi, K., Matsuoka, N., 2006. Anxiolytic activity of a novel potent serotonin 5-HT<sub>2C</sub> receptor antagonist FR260010: a comparison with diazepam and buspirone. *Eur J Pharmacol* 553, 171–184. doi:10.1016/j.ejphar.2006.09.042

Harris, R.B., Zhou, J., Shi, M., Redmann, S., Mynatt, R.L., Ryan, D.H., 2001.

Overexpression of agouti protein and stress responsiveness in mice. *Physiol Behav* 73, 599–608.

Hasenohrl, R.U., Nichau, C.H., Frisch, C.H., De Souza Silva, M.A., Huston, J.P., Mattern, C.M., Hacker, R., 1996. Anxiolytic-like effect of combined extracts of *Zingiber officinale* and *Ginkgo biloba* in the elevated plus-maze. *Pharmacol Biochem Behav* 53, 271–275.

Hazim, A.I., Ramanathan, S., Parthasarathy, S., Muzaimi, M., Mansor, S.M., 2014.

- Anxiolytic-like effects of mitragynine in the open-field and elevated plus-maze tests in rats. *J Physiol Sci* 64, 161–169. doi:10.1007/s12576-014-0304-0
- Hermes, G., Li, N., Duman, C., Duman, R., 2011. Post-weaning chronic social isolation produces profound behavioral dysregulation with decreases in prefrontal cortex synaptic-associated protein expression in female rats. *Physiol Behav* 104, 354–359. doi:10.1016/j.physbeh.2010.12.019
- Higgins, J., Thompson, S.G., Deeks, J.J., Altman, D.G., 2003. Measuring inconsistency in meta-analyses. *BMJ: British Medical Journal* 327, 557–560.
- Hirani, K., Sharma, A.N., Jain, N.S., Ugale, R.R., Chopde, C.T., 2005. Evaluation of GABAergic neuroactive steroid 3alpha-hydroxy-5alpha-pregnane-20-one as a neurobiological substrate for the anti-anxiety effect of ethanol in rats. *Psychopharmacology (Berl)* 180, 267–278. doi:10.1007/s00213-005-2169-7
- Holmes, A., Lit, Q., Murphy, D.L., Gold, E., Crawley, J.N., 2003a. Abnormal anxiety-related behavior in serotonin transporter null mutant mice: the influence of genetic background. *Genes Brain Behav* 2, 365–380.
- Holmes, A., Yang, R.J., Lesch, K.-P., Crawley, J.N., Murphy, D.L., 2003b. Mice lacking the serotonin transporter exhibit 5-HT(1A) receptor-mediated abnormalities in tests for anxiety-like behavior. *Neuropsychopharmacology* 28, 2077–2088. doi:10.1038/sj.npp.1300266
- Huerta-Reyes, M., Herrera-Ruiz, M., Gonzalez-Cortazar, M., Zamilpa, A., Leon, E., Reyes-Chilpa, R., Aguilar-Rojas, A., Tortoriello, J., 2013. Neuropharmacological in vivo effects and phytochemical profile of the extract from the aerial parts of *Heteropterys brachiata* (L.) DC. (Malpighiaceae). *J Ethnopharmacol* 146, 311–317. doi:10.1016/j.jep.2012.12.049
- Hui, K.M., Huen, M.S.Y., Wang, H.Y., Zheng, H., Sigel, E., Baur, R., Ren, H., Li, Z.W., Wong,

- J.T.-F., Xue, H., 2002. Anxiolytic effect of wogonin, a benzodiazepine receptor ligand isolated from *Scutellaria baicalensis* Georgi. *Biochem. Pharmacol.* 64, 1415–1424.
- Imai, H., Tajika, A., Chen, P., Pompoli, A., Guaiana, G., Castellazzi, M., Bighelli, I., Girlanda, F., Barbui, C., Koesters, M., Cipriani, A., Furukawa, T.A., 2014. Azapirones versus placebo for panic disorder in adults. *Cochrane database of systematic reviews* (Online) 9, CD010828–CD010828. doi:10.1002/14651858.CD010828.pub2
- Imanaka, A., Morinobu, S., Toki, S., Yamamoto, S., Matsuki, A., Kozuru, T., Yamawaki, S., 2008. Neonatal tactile stimulation reverses the effect of neonatal isolation on open-field and anxiety-like behavior, and pain sensitivity in male and female adult Sprague-Dawley rats. *Behav Brain Res* 186, 91–97. doi:10.1016/j.bbr.2007.07.039
- Imanaka, A., Morinobu, S., Toki, S., Yamawaki, S., 2006. Importance of early environment in the development of post-traumatic stress disorder-like behaviors. *Behav Brain Res* 173, 129–137. doi:10.1016/j.bbr.2006.06.012
- Ishaq, H., 2014. Anxiolytic effect of herbal medicine, *Khamira Gaozaban Ambri Jadwar Ood Salib Wala* (KGJ) in experimental rat models. *Pak J Pharm Sci* 27, 289–294.
- Jain, A., Dvorkin, A., Fonio, E., Golani, I., Gross, C.T., 2012. Validation of the dimensionality emergence assay for the measurement of innate anxiety in laboratory mice. *Eur Neuropsychopharmacol* 22, 153–163. doi:10.1016/j.euroneuro.2011.07.001
- Jain, N.S., Hirani, K., Chopde, C.T., 2005. Reversal of caffeine-induced anxiety by neurosteroid 3- $\alpha$ -hydroxy-5- $\alpha$ -pregnane-20-one in rats. *Neuropharmacology* 48, 627–638. doi:10.1016/j.neuropharm.2004.11.016
- Jastrzebska-Wiesek, M., Siwek, A., Partyka, A., Kubacka, M., Mogilski, S., Wasik, A., Kolaczowski, M., Wesolowska, A., 2014. Pharmacological evaluation of the anxiolytic-like effects of EMD 386088, a partial 5-HT<sub>6</sub> receptor agonist, in the rat elevated plus-maze and Vogel conflict tests. *Neuropharmacology* 85, 253–262.

doi:10.1016/j.neuropharm.2014.05.036

Jászberényi, M., Bagosi, Z., Thurzó, B., Földesi, I., Szabó, G., Telegdy, G., 2009. Endocrine, behavioral and autonomic effects of neuropeptide AF. *Horm Behav* 56, 24–34.

doi:10.1016/j.yhbeh.2009.02.006

Jászberényi, M., Bagosi, Z., Thurzó, B., Földesi, I., Telegdy, G., 2007. Endocrine and behavioral effects of neuromedin S. *Horm Behav* 52, 631–639.

doi:10.1016/j.yhbeh.2007.08.002

Jennings, K.A., Loder, M.K., Sheward, W.J., Pei, Q., Deacon, R.M.J., Benson, M.A., Olverman, H.J., Hastie, N.D., Harmar, A.J., Shen, S., Sharp, T., 2006. Increased expression of the 5-HT transporter confers a low-anxiety phenotype linked to decreased 5-HT transmission. *J Neurosci* 26, 8955–8964.

doi:10.1523/JNEUROSCI.5356-05.2006

Jessa, M., Nazar, M., Bidzinski, A., Plaznik, A., 1996. The effects of repeated administration of diazepam, MK-801 and CGP 37849 on rat behavior in two models of anxiety. *European Neuropsychopharmacology* 6, 55–61.

Jones, G.H., Schneider, C., Schneider, H.H., Seidler, J., Cole, B.J., Stephens, D.N., 1994. Comparison of several benzodiazepine receptor ligands in two models of anxiolytic activity in the mouse: an analysis based on fractional receptor occupancies. *Psychopharmacology (Berl)* 114, 191–199.

Joshi, J.C., Ray, A., Gulati, K., 2014. Differential modulatory effects of morphine on acute and chronic stress induced neurobehavioral and cellular markers in rats. *Eur J Pharmacol* 729, 17–21. doi:10.1016/j.ejphar.2014.01.058

Kalouda, T., Pitsikas, N., 2015. The nitric oxide donor molsidomine induces anxiolytic-like behaviour in two different rat models of anxiety. *Pharmacol Biochem Behav* 138, 111–116. doi:10.1016/j.pbb.2015.09.004

- Kalueff, A.V., Fox, M.A., Gallagher, P.S., Murphy, D.L., 2007a. Hypolocomotion, anxiety and serotonin syndrome-like behavior contribute to the complex phenotype of serotonin transporter knockout mice. *Genes Brain Behav* 6, 389–400. doi:10.1111/j.1601-183X.2006.00270.x
- Kalueff, A.V., Jensen, C.L., Murphy, D.L., 2007b. Locomotory patterns, spatiotemporal organization of exploration and spatial memory in serotonin transporter knockout mice. *Brain Res* 1169, 87–97. doi:10.1016/j.brainres.2007.07.009
- Karakas, A., Coskun, H., Kaya, A., Kucuk, A., Gunduz, B., 2011. The effects of the intraamygdalar melatonin injections on the anxiety like behavior and the spatial memory performance in male Wistar rats. *Behav Brain Res* 222, 141–150. doi:10.1016/j.bbr.2011.03.029
- Karim, N., Gavande, N., Wellendorph, P., Johnston, G.A.R., Hanrahan, J.R., Chebib, M., 2011. 3-Hydroxy-2'-methoxy-6-methylflavone: a potent anxiolytic with a unique selectivity profile at GABA(A) receptor subtypes. *Biochem. Pharmacol.* 82, 1971–1983. doi:10.1016/j.bcp.2011.09.002
- Kebebew, Z., Shibeshi, W., 2013. Evaluation of anxiolytic and sedative effects of 80% ethanolic *Carica papaya* L. (Caricaceae) pulp extract in mice. *J Ethnopharmacol* 150, 665–671. doi:10.1016/j.jep.2013.09.023
- Kirsch, I., Deacon, B.J., Huedo-Medina, T.B., Scoboria, A., Moore, T.J., Johnson, B.T., 2008. Initial severity and antidepressant benefits: a meta-analysis of data submitted to the Food and Drug Administration. *PLoS Med* 5, e45. doi:10.1371/journal.pmed.0050045
- Klemenhagen, K.C., Gordon, J.A., David, D.J., Hen, R., Gross, C.T., 2006. Increased fear response to contextual cues in mice lacking the 5-HT1A receptor. *Neuropsychopharmacology* 31, 101–111. doi:10.1038/sj.npp.1300774

- Klodzinska, A., Tatarczynska, E., Chojnacka-Wojcik, E., Nowak, G., Cosford, N.D.P., Pilc, A., 2004a. Anxiolytic-like effects of MTEP, a potent and selective mGlu5 receptor agonist does not involve GABA(A) signaling. *Neuropharmacology* 47, 342–350.
- Klodzinska, A., Tatarczynska, E., Stachowicz, K., Chojnacka-Wojcik, E., 2004b. The anxiolytic-like activity of AIDA (1-aminoindan-1,5-dicarboxylic acid), an mGlu 1 receptor antagonist. *J Physiol Pharmacol* 55, 113–126.
- Knuth, E.D., Etgen, A.M., 2007. Long-term behavioral consequences of brief, repeated neonatal isolation. *Brain Res* 1128, 139–147. doi:10.1016/j.brainres.2006.10.054
- Koike, H., Ibi, D., Mizoguchi, H., Nagai, T., Nitta, A., Takuma, K., Nabeshima, T., Yoneda, Y., Yamada, K., 2009. Behavioral abnormality and pharmacologic response in social isolation-reared mice. *Behav Brain Res* 202, 114–121. doi:10.1016/j.bbr.2009.03.028
- Kokare, D.M., Dandekar, M.P., Singru, P.S., Gupta, G.L., Subhedar, N.K., 2010. Involvement of alpha-MSH in the social isolation induced anxiety- and depression-like behaviors in rat. *Neuropharmacology* 58, 1009–1018. doi:10.1016/j.neuropharm.2010.01.006
- Kong, W.X., Chen, S.W., Li, Y.L., Zhang, Y.J., Wang, R., Min, L., Mi, X., 2006. Effects of taurine on rat behaviors in three anxiety models. *Pharmacol Biochem Behav* 83, 271–276. doi:10.1016/j.pbb.2006.02.007
- Kormos, V., Gaszner, B., 2013. Role of neuropeptides in anxiety, stress, and depression: from animals to humans. *Neuropeptides* 47, 401–419. doi:10.1016/j.npep.2013.10.014
- Kumar, D., Bhat, Z.A., 2014. Apigenin 7-glucoside from *Stachys tibetica* Vatke and its anxiolytic effect in rats. *Phytomedicine* 21, 1010–1014. doi:10.1016/j.phymed.2013.12.001
- Kurhe, Y.V., Radhakrishnan, M., Thangaraj, D., Gupta, D., 2014. Anti-anxiety effect of a novel 5-HT(3) receptor antagonist N-(benzo[d]thiazol-2-yl)-3-ethoxyquinoxalin-2-

- carboxamide (6k) using battery tests for anxiety in mice. *Indian J Pharmacol* 46, 100–104.
- Kuribara, H., Kishi, E., Kimura, M., Weintraub, S.T., Maruyama, Y., 2000. Comparative assessment of the anxiolytic-like activities of honokiol and derivatives. *Pharmacol Biochem Behav* 67, 597–601.
- Kusserow, H., Davies, B., Hörtnagl, H., Voigt, I., Stroh, T., Bert, B., Deng, D.R., Fink, H., Veh, R.W., Theuring, F., 2004. Reduced anxiety-related behaviour in transgenic mice overexpressing serotonin 1A receptors. *Brain Res Mol Brain Res* 129, 104–116.  
doi:10.1016/j.molbrainres.2004.06.028
- la Pena, de, J.B.I., Lee, H.L., Yoon, S.Y., Kim, G.H., Lee, Y.S., Cheong, J.H., 2013. The involvement of magnoflorine in the sedative and anxiolytic effects of *Sinomeni Caulis et Rhizoma* in mice. *J Nat Med* 67, 814–821. doi:10.1007/s11418-013-0754-3
- LaBuda, C.J., Fuchs, P.N., 2001. The anxiolytic effect of acute ethanol or diazepam exposure is unaltered in mu-opioid receptor knockout mice. *Brain Res Bull* 55, 755–760.
- Langen, B., Egerland, U., Bernoster, K., Dost, R., Unverferth, K., Rundfeldt, C., 2005. Characterization in rats of the anxiolytic potential of ELB139 [1-(4-chlorophenyl)-4-piperidin-1-yl-1,5-dihydro-imidazol-2-on], a new agonist at the benzodiazepine binding site of the GABAA receptor. *J Pharmacol Exp Ther* 314, 717–724.  
doi:10.1124/jpet.105.084681
- Lapiz, M.D., Mateo, Y., Durkin, S., Parker, T., Marsden, C.A., 2001. Effects of central noradrenaline depletion by the selective neurotoxin DSP-4 on the behaviour of the isolated rat in the elevated plus maze and water maze. *Psychopharmacology (Berl)* 155, 251–259.
- Leggio, G.M., Micale, V., Le Foll, B., Mazzola, C., Nobrega, J.N., Drago, F., 2011. Dopamine

- D3 receptor knock-out mice exhibit increased behavioral sensitivity to the anxiolytic drug diazepam. *European Neuropsychopharmacology* 21, 325–332.  
doi:10.1016/j.euroneuro.2010.05.006
- Leite-Almeida, H., Cerqueira, J.J., Wei, H., Ribeiro-Costa, N., Anjos-Martins, H., Sousa, N., Pertovaara, A., Almeida, A., 2012. Differential effects of left/right neuropathy on rats' anxiety and cognitive behavior. *Pain* 153, 2218–2225. doi:10.1016/j.pain.2012.07.007
- Lepicard, E.M., Joubert, C., Hagneau, I., Perez-Diaz, F., Chapouthier, G., 2000. Differences in anxiety-related behavior and response to diazepam in BALB/cByJ and C57BL/6J strains of mice. *Pharmacol Biochem Behav* 67, 739–748.
- Leussis, M.P., Andersen, S.L., 2008. Is adolescence a sensitive period for depression? Behavioral and neuroanatomical findings from a social stress model. *Synapse* 62, 22–30. doi:10.1002/syn.20462
- Li, Q., Holmes, A., Ma, L., Van de Kar, L.D., Garcia, F., Murphy, D.L., 2004. Medial hypothalamic 5-hydroxytryptamine (5-HT)<sub>1A</sub> receptors regulate neuroendocrine responses to stress and exploratory locomotor activity: application of recombinant adenovirus containing 5-HT<sub>1A</sub> sequences. *J Neurosci* 24, 10868–10877.  
doi:10.1523/JNEUROSCI.3223-04.2004
- Liebsch, G., Landgraf, R., Engelmann, M., Lörscher, P., Holsboer, F., 1999. Differential behavioural effects of chronic infusion of CRH 1 and CRH 2 receptor antisense oligonucleotides into the rat brain. *J Psychiatr Res* 33, 153–163.
- Liebsch, G., Landgraf, R., Gerstberger, R., Probst, J.C., Wotjak, C.T., Engelmann, M., Holsboer, F., Montkowski, A., 1995. Chronic infusion of a CRH1 receptor antisense oligodeoxynucleotide into the central nucleus of the amygdala reduced anxiety-related behavior in socially defeated rats. *Regul. Pept.* 59, 229–239.
- Line, S.J., Barkus, C., Coyle, C., Jennings, K.A., Deacon, R.M., Lesch, K.P., Sharp, T.,



- Bannerman, D.M., 2011. Opposing alterations in anxiety and species-typical behaviours in serotonin transporter overexpressor and knockout mice. *Eur Neuropsychopharmacol* 21, 108–116. doi:10.1016/j.euroneuro.2010.08.005
- Linge, R., Pazos, A., Diaz, A., 2013. Social isolation differentially affects anxiety and depressive-like responses of bulbectomized mice. *Behav Brain Res* 245, 1–6. doi:10.1016/j.bbr.2013.01.041
- Lira, A., Zhou, M., Castanon, N., Ansorge, M.S., Gordon, J.A., Francis, J.H., Bradley-Moore, M., Lira, J., Underwood, M.D., Arango, V., Kung, H.F., Hofer, M.A., Hen, R., Gingrich, J.A., 2003. Altered depression-related behaviors and functional changes in the dorsal raphe nucleus of serotonin transporter-deficient mice. *Biol Psychiatry* 54, 960–971.
- Liu, Chen, Maejima, T., Wyler, S.C., Casadesus, G., Herlitze, S., Deneris, E.S., 2010. Pet-1 is required across different stages of life to regulate serotonergic function. *Nat Neurosci* 13, 1190–1198. doi:10.1038/nn.2623
- Liu, Jie, Zhai, W.-M., Yang, Y.-X., Shi, J.-L., Liu, Q.-T., Liu, G.-L., Fang, N., Li, J., Guo, J.-Y., 2015. GABA and 5-HT systems are implicated in the anxiolytic-like effect of spinosin in mice. *Pharmacol Biochem Behav* 128, 41–49. doi:10.1016/j.pbb.2014.11.003
- Liu, Jing, Garza, J.C., Li, W., Lu, X.-Y., 2011. Melanocortin-4 receptor in the medial amygdala regulates emotional stress-induced anxiety-like behaviour, anorexia and corticosterone secretion. *Int J Neuropsychopharmacol* 16, 105–120. doi:10.1017/S146114571100174X
- Liu, Xiao, Wu, R., Tai, F., Ma, L., Wei, B., Yang, X., Zhang, X., Jia, R., 2013. Effects of group housing on stress induced emotional and neuroendocrine alterations. *Brain Res* 1502, 71–80. doi:10.1016/j.brainres.2013.01.044
- Liu, Yan, Yang, L., Yu, J., Zhang, Y.-Q., 2015. Persistent, comorbid pain and anxiety can be uncoupled in a mouse model. *Physiol Behav* 151, 55–63.

doi:10.1016/j.physbeh.2015.07.004

Locchi, F., Dall'olio, R., Gandolfi, O., Rimondini, R., 2008. Olanzapine counteracts stress-induced anxiety-like behavior in rats. *Neurosci Lett* 438, 146–149.

doi:10.1016/j.neulet.2008.04.017

Lolli, L.F., Sato, C.M., Romanini, C.V., Villas-Boas, L.D.B., Santos, C.A.M., de Oliveira, R.M.W., 2007. Possible involvement of GABA A-benzodiazepine receptor in the anxiolytic-like effect induced by *Passiflora actinia* extracts in mice. *J Ethnopharmacol* 111, 308–314. doi:10.1016/j.jep.2006.11.021

Lukkes, J.L., Mokin, M.V., Scholl, J.L., Forster, G.L., 2009. Adult rats exposed to early-life social isolation exhibit increased anxiety and conditioned fear behavior, and altered hormonal stress responses. *Horm Behav* 55, 248–256.

doi:10.1016/j.yhbeh.2008.10.014

Lunga, P., Herbert, J., 2004. 17Beta-oestradiol modulates glucocorticoid, neural and behavioural adaptations to repeated restraint stress in female rats. *Journal of Neuroendocrinology* 16, 776–785. doi:10.1111/j.1365-2826.2004.01234.x

Mahendra, P., Bisht, S., 2011. Anti-anxiety activity of *Coriandrum sativum* assessed using different experimental anxiety models. *Indian J Pharmacol* 43, 574–577.

Majercsik, E., Haller, J., Leveleki, C., Baranyi, J., Halász, J., Rodgers, R.J., 2003. The effect of social factors on the anxiolytic efficacy of buspirone in male rats, male mice, and men. *Prog Neuropsychopharmacol Biol Psychiatry* 27, 1187–1199.

doi:10.1016/j.pnpbp.2003.09.013

Mansouri, M.T., Soltani, M., Naghizadeh, B., Farbood, Y., Mashak, A., Sarkaki, A., 2014. A possible mechanism for the anxiolytic-like effect of gallic acid in the rat elevated plus maze. *Pharmacol Biochem Behav* 117, 40–46. doi:10.1016/j.pbb.2013.12.011

Martinez, A.L., Dominguez, F., Orozco, S., Chavez, M., Salgado, H., González, M.,

- Gonzalez-Trujano, M.E., 2006. Neuropharmacological effects of an ethanol extract of the *Magnolia dealbata* Zucc. leaves in mice. *J Ethnopharmacol* 106, 250–255.  
doi:10.1016/j.jep.2006.01.003
- Matsuzawa-Yanagida, K., Narita, M., Nakajima, M., Kuzumaki, N., Niikura, K., Nozaki, H., Takagi, T., Tamai, E., Hareyama, N., Terada, M., Yamazaki, M., Suzuki, T., 2008. Usefulness of antidepressants for improving the neuropathic pain-like state and pain-induced anxiety through actions at different brain sites. *Neuropsychopharmacology* 33, 1952–1965. doi:10.1038/sj.npp.1301590
- McCool, B.A., Chappell, A.M., 2009. Early social isolation in male Long-Evans rats alters both appetitive and consummatory behaviors expressed during operant ethanol self-administration. *Alcohol Clin Exp Res* 33, 273–282. doi:10.1111/j.1530-0277.2008.00830.x
- Mechan, A.O., Moran, P.M., Elliott, M., Young, A.J., Joseph, M.H., Green, R., 2002. A comparison between Dark Agouti and Sprague-Dawley rats in their behaviour on the elevated plus-maze, open-field apparatus and activity meters, and their response to diazepam. *Psychopharmacology (Berl)* 159, 188–195. doi:10.1007/s002130100902
- Melo, F.H.C., Venancio, E.T., de Sousa, D.P., de Franca Fonteles, M.M., de Vasconcelos, S.M.M., Viana, G.S.B., de Sousa, F.C.F., 2010. Anxiolytic-like effect of Carvacrol (5-isopropyl-2-methylphenol) in mice: involvement with GABAergic transmission. *Fundam Clin Pharmacol* 24, 437–443. doi:10.1111/j.1472-8206.2009.00788.x
- Mesfin, M., Asres, K., Shibeshi, W., 2014. Evaluation of anxiolytic activity of the essential oil of the aerial part of *Foeniculum vulgare* Miller in mice. *BMC Complement Altern Med* 14, 310. doi:10.1186/1472-6882-14-310
- Meyer, L., Boujedaini, N., Patte-Mensah, C., Mensah-Nyagan, A.G., 2013. Pharmacological effect of gelsemine on anxiety-like behavior in rat. *Behav Brain Res* 253, 90–94.

doi:10.1016/j.bbr.2013.07.010

Mi, X.J., Chen, S.W., Wang, W.J., Wang, R., Zhang, Y.J., Li, W.J., Li, Y.L., 2005. Anxiolytic-like effect of paeonol in mice. *Pharmacol Biochem Behav* 81, 683–687.

doi:10.1016/j.pbb.2005.04.016

Micale, V., Cristino, L., Tamburella, A., Petrosino, S., Leggio, G.M., Drago, F., Di Marzo, V., 2009. Anxiolytic effects in mice of a dual blocker of fatty acid amide hydrolase and transient receptor potential vanilloid type-1 channels. *Neuropsychopharmacology* 34, 593–606. doi:10.1038/npp.2008.98

Micale, V., Tamburella, A., Leggio, G.M., Mazzola, C., Li Volsi, V., Drago, F., 2008.

Behavioral effects of saredutant, a tachykinin NK2 receptor antagonist, in experimental models of mood disorders under basal and stress-related conditions. *Pharmacol Biochem Behav* 90, 463–469. doi:10.1016/j.pbb.2008.04.003

Molander, A.C., Mar, A., Norbury, A., Steventon, S., Moreno, M., Caprioli, D., Theobald, D.E.H., Belin, D., Everitt, B.J., Robbins, T.W., Dalley, J.W., 2011. High impulsivity predicting vulnerability to cocaine addiction in rats: some relationship with novelty preference but not novelty reactivity, anxiety or stress. *Psychopharmacology (Berl)* 215, 721–731. doi:10.1007/s00213-011-2167-x

Molina-Hernandez, M., Tellez-Alcantara, N.P., Garcia, J.P., Lopez, J.I.O., Jaramillo, M.T., 2004. Anxiolytic-like actions of leaves of *Casimiroa edulis* (Rutaceae) in male Wistar rats. *J Ethnopharmacol* 93, 93–98.

Mora, S., Díaz-Véliz, G., Lungenstrass, H., Garcia-Gonzalez, M., Coto-Morales, T., Poletti, C., De Lima, T.C.M., Herrera-Ruiz, M., Tortoriello, J., 2005. Central nervous system activity of the hydroalcoholic extract of *Casimiroa edulis* in rats and mice. *J Ethnopharmacol* 97, 191–197. doi:10.1016/j.jep.2004.10.028

Moragrega, I., Carrasco, M.C., Vicens, P., Redolat, R., 2003. Spatial learning in male mice

with different levels of aggressiveness: effects of housing conditions and nicotine administration. *Behav Brain Res* 147, 1–8.

Moreira, M.R.C., Salvadori, M.G.D.S.S., de Almeida, A.A.C., de Sousa, D.P., Jordan, J., Satyal, P., de Freitas, R.M., de Almeida, R.N., 2014. Anxiolytic-like effects and mechanism of (-)-myrtenol: a monoterpene alcohol. *Neurosci Lett* 579, 119–124. doi:10.1016/j.neulet.2014.07.007

Moya, P.R., Fox, M.A., Jensen, C.L., LaPorte, J.L., French, H.T., Wendland, J.R., Murphy, D.L., 2011. Altered 5-HT<sub>2C</sub> receptor agonist-induced responses and 5-HT<sub>2C</sub> receptor RNA editing in the amygdala of serotonin transporter knockout mice. *BMC Pharmacol* 11, 3. doi:10.1186/1471-2210-11-3

Müller, M.B., Zimmermann, S., Sillaber, I., Hagemeyer, T.P., Deussing, J.M., Timpl, P., Kormann, M.S.D., Droste, S.K., Kühn, R., Reul, J.M.H.M., Holsboer, F., Würst, W., 2003. Limbic corticotropin-releasing hormone receptor 1 mediates anxiety-related behavior and hormonal adaptation to stress. *Nat Neurosci* 6, 1100–1107. doi:10.1038/nn1123

Nagaraja, T.S., Mahmood, R., Krishna, V., Thippeswamy, B.S., Veerapur, V.P., 2012. Evaluation of anxiolytic effect of *Erythrina mysorensis* Gamb. in mice. *Indian J Pharmacol* 44, 489–492.

Nosek, K., Dennis, K., Andrus, B.M., Ahmadiyah, N., Baum, A.E., Solberg Woods, L.C., Redei, E.E., 2008. Context and strain-dependent behavioral response to stress. *Behav Brain Funct* 4, 23. doi:10.1186/1744-9081-4-23

Ochoa-Sanchez, R., Rainer, Q., Comai, S., Spadoni, G., Bedini, A., Rivara, S., Fraschini, F., Mor, M., Tarzia, G., Gobbi, G., 2012. Anxiolytic effects of the melatonin MT<sub>2</sub> receptor partial agonist UCM765: comparison with melatonin and diazepam. *Prog Neuropsychopharmacol Biol Psychiatry* 39, 318–325. doi:10.1016/j.pnpbp.2012.07.003

- Ognibene, E., Bovicelli, P., Adriani, W., Saso, L., Laviola, G., 2008. Behavioral effects of 6-bromoflavanone and 5-methoxy-6,8-dibromoflavanone as anxiolytic compounds. *Prog Neuropsychopharmacol Biol Psychiatry* 32, 128–134. doi:10.1016/j.pnpbp.2007.07.023
- Okuyama, S., Chaki, S., Yoshikawa, R., Ogawa, S., Suzuki, Y., Okubo, T., Nakazato, A., Nagamine, M., Tomisawa, K., 1999. Neuropharmacological profile of peripheral benzodiazepine receptor agonists, DAA1097 and DAA1106. *Life Sci.* 64, 1455–1464.
- Olivier, J.D.A., Van Der Hart, M.G.C., Van Swelm, R.P.L., Dederen, P.J., Homberg, J.R., Cremers, T., Deen, P.M.T., Cuppen, E., Cools, A.R., Ellenbroek, B.A., 2008. A study in male and female 5-HT transporter knockout rats: an animal model for anxiety and depression disorders. *Neuroscience* 152, 573–584.  
doi:10.1016/j.neuroscience.2007.12.032
- Onusic, G.M., Nogueira, R.L., Pereira, A.M.S., Viana, M.B., 2002. Effect of acute treatment with a water-alcohol extract of *Erythrina mulungu* on anxiety-related responses in rats. *Braz J Med Biol Res* 35, 473–477.
- Ouagazzal, A.-M., Moreau, J.-L., Pauly-Evers, M., Jenck, F., 2003. Impact of environmental housing conditions on the emotional responses of mice deficient for nociceptin/orphanin FQ peptide precursor gene. *Behav Brain Res* 144, 111–117.
- Owens, M.J., Nemeroff, C.B., 1991. Physiology and pharmacology of corticotropin-releasing factor. *Pharmacol Rev* 43, 425–473.
- Paez-Pereda, M., Hausch, F., Holsboer, F., 2011. Corticotropin releasing factor receptor antagonists for major depressive disorder. *Expert Opin Investig Drugs* 20, 519–535.  
doi:10.1517/13543784.2011.565330
- Pain, L., Oberling, P., Launoy, A., Di Scala, G., 1999. Effect of nonsedative doses of propofol on an innate anxiogenic situation in rats. *Anesthesiology* 90, 191–196.
- Paine, T.A., Jackman, S.L., Olmstead, M.C., 2002. Cocaine-induced anxiety: alleviation by

- diazepam, but not buspirone, dimenhydrinate or diphenhydramine. *Behav Pharmacol* 13, 511–523.
- Pang, R.D., Wang, Z., Klosinski, L.P., Guo, Y., Herman, D.H., Celikel, T., Dong, H.-W., Holschneider, D.P., 2011. Mapping functional brain activation using [14C]-iodoantipyrine in male serotonin transporter knockout mice. *PLoS ONE* 6, e23869. doi:10.1371/journal.pone.0023869
- Parent, A.J., Beaudet, N., Beaudry, H., Bergeron, J., Bérubé, P., Drolet, G., Sarret, P., Gendron, L., 2012. Increased anxiety-like behaviors in rats experiencing chronic inflammatory pain. *Behav Brain Res* 229, 160–167. doi:10.1016/j.bbr.2012.01.001
- Parks, C.L., Robinson, P.S., Sibille, E., Shenk, T., Toth, M., 1998. Increased anxiety of mice lacking the serotonin1A receptor. *Proc Natl Acad Sci USA* 95, 10734–10739.
- Pellow, S., Chopin, P., File, S.E., Briley, M., 1985. Validation of open:closed arm entries in an elevated plus-maze as a measure of anxiety in the rat. *J Neurosci Methods* 14, 149–167.
- Peng, W.-H., Wu, C.-R., Chen, C.-S., Chen, C.-F., Leu, Z.-C., Hsieh, M.-T., 2004. Anxiolytic effect of berberine on exploratory activity of the mouse in two experimental anxiety models: interaction with drugs acting at 5-HT receptors. *Life Sci.* 75, 2451–2462.
- Perez-Caballero, L., Torres-Sanchez, S., Bravo, L., Mico, J.A., Berrocoso, E., 2014. Fluoxetine: a case history of its discovery and preclinical development. *Expert Opin Drug Discov* 9, 567–578. doi:10.1517/17460441.2014.907790
- Pires, L.F., Costa, L.M., Silva, O.A., de Almeida, A.A.C., Cerqueira, G.S., de Sousa, D.P., de Freitas, R.M., 2013. Anxiolytic-like effects of carvacryl acetate, a derivative of carvacrol, in mice. *Pharmacol Biochem Behav* 112, 42–48. doi:10.1016/j.pbb.2013.09.001
- Pisu, M.G., Garau, A., Olla, P., Biggio, F., Utzeri, C., Dore, R., Serra, M., 2013. Altered stress responsiveness and hypothalamic-pituitary-adrenal axis function in male rat

offspring of socially isolated parents. *J Neurochem* 126, 493–502.

doi:10.1111/jnc.12273

Pisu, M.G., Mostallino, M.C., Dore, R., Maciocco, E., Secci, P.P., Serra, M., 2011. Effects of voluntary ethanol consumption on emotional state and stress responsiveness in socially isolated rats. *European Neuropsychopharmacology* 21, 414–425.

doi:10.1016/j.euroneuro.2010.07.006

Piszczek, L., Schlax, K., Wyrzykowska, A., Piszczek, A., Audero, E., Thilo Gross, C., 2013. Serotonin 1A auto-receptors are not sufficient to modulate anxiety in mice. *Eur J Neurosci* 38, 2621–2627. doi:10.1111/ejn.12260

Plaznik, A., Palejko, W., Nazar, M., Jessa, M., 1994. Effects of antagonists at the NMDA receptor complex in two models of anxiety. *European Neuropsychopharmacology* 4, 503–512.

Ponten, E., Fredriksson, A., Gordh, T., Eriksson, P., Viberg, H., 2011. Neonatal exposure to propofol affects BDNF but not CaMKII, GAP-43, synaptophysin and tau in the neonatal brain and causes an altered behavioural response to diazepam in the adult mouse brain. *Behav Brain Res* 223, 75–80. doi:10.1016/j.bbr.2011.04.019

Popik, P., Kostakis, E., Krawczyk, M., Nowak, G., Szewczyk, B., Krieter, P., Chen, Z., Russek, S.J., Gibbs, T.T., Farb, D.H., Skolnick, P., Lippa, A.S., Basile, A.S., 2006. The anxiolytic agent 7-(2-chloropyridin-4-yl)pyrazolo-[1,5-a]-pyrimidin-3-yl(pyridin-2-yl)methanone (DOV 51892) is more efficacious than diazepam at enhancing GABA-gated currents at alpha1 subunit-containing GABAA receptors. *J Pharmacol Exp Ther* 319, 1244–1252. doi:10.1124/jpet.106.107201

Pritchard, L.M., Van Kempen, T.A., Williams, H., Zimmerberg, B., 2008. A laboratory exercise for a college-level, introductory neuroscience course demonstrating effects of housing environment on anxiety and psychostimulant sensitivity. *J Undergrad Neurosci*



Educ 7, A26–32.

Prut, L., Belzung, C., 2003. The open field as a paradigm to measure the effects of drugs on anxiety-like behaviors: a review. *Eur J Pharmacol* 463, 3–33. doi:10.1016/S0014-2999(03)01272-X

Quintino-dos-Santos, J.W., Muller, C.J.T., Bernabe, C.S., Rosa, C.A., Tufik, S., Schenberg, L.C., 2014. Evidence that the periaqueductal gray matter mediates the facilitation of panic-like reactions in neonatally-isolated adult rats. *PLoS ONE* 9, e90726.

Radulovic, N.S., Miltojevic, A.B., Randjelovic, P.J., Stojanovic, N.M., Boylan, F., 2013. Effects of methyl and isopropyl N-methylantranilates from *Choisya ternata* Kunth (Rutaceae) on experimental anxiety and depression in mice. *Phytother Res* 27, 1334–1338. doi:10.1002/ptr.4877

Rago, L., Kiivet, R.A., Harro, J., Pold, M., 1988. Behavioral differences in an elevated plus-maze: correlation between anxiety and decreased number of GABA and benzodiazepine receptors in mouse cerebral cortex. *Naunyn Schmiedebergs Arch Pharmacol* 337, 675–678.

Ramanathan, M., Jaiswal, A.K., Bhattacharya, S.K., 1998. Differential effects of diazepam on anxiety in streptozotocin induced diabetic and non-diabetic rats. *Psychopharmacology (Berl)* 135, 361–367.

Ramboz, S., Oosting, R., Amara, D.A., Kung, H.F., Blier, P., Mendelsohn, M., Mann, J.J., Brunner, D., Hen, R., 1998. Serotonin receptor 1A knockout: an animal model of anxiety-related disorder. *Proc Natl Acad Sci USA* 95, 14476–14481.

Raquibul Hasan, S.M., Hossain, M.M., Akter, R., Jamila, M., Mazumder, E.H., Rahman, S., 2009. Sedative and anxiolytic effects of different fractions of the *Commelina benghalensis* Linn. *Drug Discov Ther* 3, 221–227.

Reis, D.G., Scopinho, A.A., Guimarães, F.S., Corrêa, F.M.A., Resstel, L.B.M., 2011.

- Behavioral and autonomic responses to acute restraint stress are segregated within the lateral septal area of rats. *PLoS ONE* 6, e23171. doi:10.1371/journal.pone.0023171
- Reis, F.M.C.V., Albrechet-Souza, L., Franci, C.R., Brandao, M.L., 2012. Risk assessment behaviors associated with corticosterone trigger the defense reaction to social isolation in rats: role of the anterior cingulate cortex. *Stress* 15, 318–328.  
doi:10.3109/10253890.2011.623740
- Rejon-Orantes, J.C., Suarez, D.P.P., Rejon-Rodriguez, A., Hernandez, S.H., Lievano, O.E.G., Rodriguez, D.L., la Mora, de, M.P., 2013. Aqueous root extracts from *Mimosa albida* Humb. & Bonpl. ex Willd display antinociceptive activity in mice. *J Ethnopharmacol* 149, 522–526. doi:10.1016/j.jep.2013.07.010
- Rex, A., Morgenstern, E., Fink, H., 2002. Anxiolytic-like effects of kava-kava in the elevated plus maze test--a comparison with diazepam. *Prog Neuropsychopharmacol Biol Psychiatry* 26, 855–860.
- Rochford, J., Beaulieu, S., Rousse, I., Glowa, J.R., Barden, N., 1997. Behavioral reactivity to aversive stimuli in a transgenic mouse model of impaired glucocorticoid (type II) receptor function: effects of diazepam and FG-7142. *Psychopharmacology (Berl)* 132, 145–152.
- Rodgers, R.J., Cole, J.C., 1993. Influence of social isolation, gender, strain, and prior novelty on plus-maze behaviour in mice. *Physiol Behav* 54, 729–736.
- Rylkova, D., Shah, H.P., Small, E., Bruijnzeel, A.W., 2009. Deficit in brain reward function and acute and protracted anxiety-like behavior after discontinuation of a chronic alcohol liquid diet in rats. *Psychopharmacology (Berl)* 203, 629–640.  
doi:10.1007/s00213-008-1409-z
- Ryu, V., Yoo, S.B., Kang, D.-W., Lee, J.-H., Jahng, J.W., 2009. Post-weaning isolation promotes food intake and body weight gain in rats that experienced neonatal maternal

- separation. *Brain Res* 1295, 127–134. doi:10.1016/j.brainres.2009.08.006
- Saiyudthong, S., Marsden, C.A., 2011. Acute effects of bergamot oil on anxiety-related behaviour and corticosterone level in rats. *Phytother Res* 25, 858–862. doi:10.1002/ptr.3325
- Sakaue, M., Ago, Y., Sowa, C., Koyama, Y., Baba, A., Matsuda, T., 2003. The 5-HT<sub>1A</sub> receptor agonist MKC-242 increases the exploratory activity of mice in the elevated plus-maze. *Eur J Pharmacol* 458, 141–144.
- Samuels, B.A., Mendez-David, I., Faye, C., David, S.A., Pierz, K.A., Gardier, A.M., Hen, R., David, D.J., 2014. Serotonin 1A and Serotonin 4 Receptors: Essential Mediators of the Neurogenic and Behavioral Actions of Antidepressants. *Neuroscientist*. doi:10.1177/1073858414561303
- Santos Rosa, D., Faggion, S.A., Gavin, A.S., Anderson de Souza, M., Fachim, H.A., Ferreira dos Santos, W., Soares Pereira, A.M., Cunha, A.O.S., Belebony, R.O., 2012. Erysothrine, an alkaloid extracted from flowers of *Erythrina mulungu* Mart. ex Benth: evaluating its anticonvulsant and anxiolytic potential. *Epilepsy Behav* 23, 205–212. doi:10.1016/j.yebeh.2012.01.003
- Santos, dos, L., de Andrade, T.G.C.S., Graeff, F.G., 2010. Social separation and diazepam withdrawal increase anxiety in the elevated plus-maze and serotonin turnover in the median raphe and hippocampus. *J Psychopharmacol (Oxford)* 24, 725–731. doi:10.1177/0269881109106954
- Satyan, K.S., Jaiswal, A.K., Ghosal, S., Bhattacharya, S.K., 1998. Anxiolytic activity of ginkgolic acid conjugates from Indian *Ginkgo biloba*. *Psychopharmacology (Berl)* 136, 148–152.
- Schaefer, A.T., Claridge-Chang, A., 2012. The surveillance state of behavioral automation. *Curr Opin Neurobiol* 22, 170–176. doi:10.1016/j.conb.2011.11.004

- Schellinck, H.M., Stanford, L., Darrah, M., 2003. Repetitive acute pain in infancy increases anxiety but does not alter spatial learning ability in juvenile mice. *Behav Brain Res* 142, 157–165. doi:10.1016/S0166-4328(02)00406-0
- Schipper, P., Nonkes, L.J.P., Karel, P., Kiliaan, A.J., Homberg, J.R., 2011. Serotonin transporter genotype x construction stress interaction in rats. *Behav Brain Res* 223, 169–175. doi:10.1016/j.bbr.2011.04.037
- Schmitt, U., Luddens, H., Hiemke, C., 2002. Anxiolytic-like effects of acute and chronic GABA transporter inhibition in rats. *J Neural Transm* 109, 871–880. doi:10.1007/s007020200071
- Schmitt, U., Luddens, H., Hiemke, C., 2001. Behavioral analysis indicates benzodiazepine-tolerance mediated by the benzodiazepine binding-site at the GABA(A)-receptor. *Prog Neuropsychopharmacol Biol Psychiatry* 25, 1145–1160.
- Sena, E.S., van der Worp, H.B., Bath, P.M.W., Howells, D.W., Macleod, M.R., 2010. Publication bias in reports of animal stroke studies leads to major overstatement of efficacy. *PLoS Biol* 8, e1000344. doi:10.1371/journal.pbio.1000344
- Serra, M., Pisu, M.G., Littera, M., Papi, G., Sanna, E., Tuveri, F., Usala, L., Purdy, R.H., Biggio, G., 2000. Social isolation-induced decreases in both the abundance of neuroactive steroids and GABA(A) receptor function in rat brain. *J Neurochem* 75, 732–740.
- Shang, L., Xu, T.-L., Li, F., Su, J., Li, W.-G., 2014. Temporal dynamics of anxiety phenotypes in a dental pulp injury model. *Mol Pain* 11, 40–40. doi:10.1186/s12990-015-0040-3
- Sherif, F., Harro, J., el-Hwuegi, A., Orelund, L., 1994. Anxiolytic-like effect of the GABA-transaminase inhibitor vigabatrin (gamma-vinyl GABA) on rat exploratory activity. *Pharmacol Biochem Behav* 49, 801–805.

- Sherif, F., Orelund, L., 1995. Effect of the GABA-transaminase inhibitor vigabatrin on exploratory behaviour in socially isolated rats. *Behav Brain Res* 72, 135–140.
- Silva, M.I.G., de Aquino Neto, M.R., Teixeira Neto, P.F., Moura, B.A., do Amaral, J.F., de Sousa, D.P., Vasconcelos, S.M.M., de Sousa, F.C.F., 2007. Central nervous system activity of acute administration of isopulegol in mice. *Pharmacol Biochem Behav* 88, 141–147. doi:10.1016/j.pbb.2007.07.015
- Simon, P., Dupuis, R., Costentin, J., 1994. Thigmotaxis as an index of anxiety in mice. Influence of dopaminergic transmissions. *Behav Brain Res* 61, 59–64.
- Simpson, J., Kelly, J.P., 2012. The effects of isolated and enriched housing conditions on baseline and drug-induced behavioural responses in the male rat. *Behav Brain Res* 234, 175–183. doi:10.1016/j.bbr.2012.06.015
- Smith, G.W., Aubry, J.M., Dellu, F., Contarino, A., Bilezikjian, L.M., Gold, L.H., Chen, R., Marchuk, Y., Hauser, C., Bentley, C.A., Sawchenko, P.E., Koob, G.F., Vale, W., Lee, K.F., 1998. Corticotropin releasing factor receptor 1-deficient mice display decreased anxiety, impaired stress response, and aberrant neuroendocrine development. *Neuron* 20, 1093–1102.
- Sorra, K., Chen, C.-S., Chang, C.-F., Pusuluri, S., Mukkanti, K., Wu, C.-R., Chuang, T.-H., 2014. Synthesis, anticonvulsant, sedative and anxiolytic activities of novel annulated pyrrolo[1,4]benzodiazepines. *Int J Mol Sci* 15, 16500–16510. doi:10.3390/ijms150916500
- Srinivasan, J., Suresh, B., Ramanathan, M., 2003. Differential anxiolytic effect of enalapril and losartan in normotensive and renal hypertensive rats. *Physiol Behav* 78, 585–591.
- Stankevicius, D., Rodrigues-Costa, E.C., Camilo Florio, J., Palermo-Neto, J., 2008. Neuroendocrine, behavioral and macrophage activity changes induced by picrotoxin effects in mice. *Neuropharmacology* 54, 300–308.

doi:10.1016/j.neuropharm.2007.09.011

Stefanski, R., Palejko, W., Kostowski, W., Plaznik, A., 1992. The comparison of benzodiazepine derivatives and serotonergic agonists and antagonists in two animal models of anxiety. *Neuropharmacology* 31, 1251–1258.

Steiner, M.A., Lecourt, H., Jenck, F., 2012. The brain orexin system and almorexant in fear-conditioned startle reactions in the rat. *Psychopharmacology (Berl)* 223, 465–475.

doi:10.1007/s00213-012-2736-7

Stemmelin, J., Cohen, C., Terranova, J.-P., Lopez-Grancha, M., Pichat, P., Bergis, O., Decobert, M., Santucci, V., Francon, D., Alonso, R., Stahl, S.M., Keane, P., Avenet, P., Scatton, B., le Fur, G., Griebel, G., 2008. Stimulation of the beta3-Adrenoceptor as a novel treatment strategy for anxiety and depressive disorders.

*Neuropsychopharmacology* 33, 574–587. doi:10.1038/sj.npp.1301424

Sterne, J.A.C., Sutton, A.J., Ioannidis, J.P.A., Terrin, N., Jones, D.R., Lau, J., Carpenter, J., Rücker, G., Harbord, R.M., Schmid, C.H., Tetzlaff, J., Deeks, J.J., Peters, J., Macaskill, P., Schwarzer, G., Duval, S., Altman, D.G., Moher, D., Higgins, J.P.T., 2011.

Recommendations for examining and interpreting funnel plot asymmetry in meta-analyses of randomised controlled trials. *BMJ* 343, d4002.

Sugiyama, A., Saitoh, A., Iwai, T., Takahashi, K., Yamada, M., Sasaki-Hamada, S., Oka, J.-I., Inagaki, M., Yamada, M., 2012. Riluzole produces distinct anxiolytic-like effects in rats without the adverse effects associated with benzodiazepines. *Neuropharmacology* 62, 2489–2498. doi:10.1016/j.neuropharm.2012.02.012

Swami, U.S., Lande, A.A., Ghadge, P.M., Adkar, P.P., Ambavade, S.D., 2014.

Pharmacological evaluation of *Chlorophytum borivillianum* Sant. & Fern. for anxiolytic activity and effect on brain GABA level. *Orient Pharm Exp Med* 14, 169–180.

doi:10.1007/s13596-013-0145-z

- Taiwo, A.E., Leite, F.B., Lucena, G.M., Barros, M., Silveira, D., Silva, M.V., Ferreira, V.M., 2012. Anxiolytic and antidepressant-like effects of *Melissa officinalis* (lemon balm) extract in rats: Influence of administration and gender. *Indian J Pharmacol* 44, 189–192. doi:10.4103/0253-7613.93846
- Tanaka, M., Satou, T., Koike, K., 2013. Anxiolytic-like effect of Shigyakusan extract with low side effects in mice. *J Nat Med* 67, 862–866. doi:10.1007/s11418-013-0746-3
- Tatarczynska, E., Klodzinska, A., Stachowicz, K., Chojnacka-Wojcik, E., 2004. Effects of a selective 5-HT<sub>1B</sub> receptor agonist and antagonists in animal models of anxiety and depression. *Behav Pharmacol* 15, 523–534.
- Thakker, D.R., Natt, F., Hüsken, D., van der Putten, H., Maier, R., Hoyer, D., Cryan, J.F., 2005. siRNA-mediated knockdown of the serotonin transporter in the adult mouse brain. *Mol Psychiatry* 10, 782–9–714. doi:10.1038/sj.mp.4001687
- Thippeswamy, B.S., Mishra, B., Veerapur, V.P., Gupta, G., 2011. Anxiolytic activity of *Nymphaea alba* Linn. in mice as experimental models of anxiety. *Indian J Pharmacol* 43, 50–55. doi:10.4103/0253-7613.75670
- Thompson, T., Grabowski-Boase, L., Tarantino, L.M., 2015. Prototypical anxiolytics do not reduce anxiety-like behavior in the open field in C57BL/6J mice. *Pharmacol Biochem Behav* 133, 7–17. doi:10.1016/j.pbb.2015.03.011
- Thongsaard, W., Deachapunya, C., Pongsakorn, S., Boyd, E.A., Bennett, G.W., Marsden, C.A., 1996. Barakol: a potential anxiolytic extracted from *Cassia siamea*. *Pharmacol Biochem Behav* 53, 753–758.
- Thorsell, A., Slawecki, C.J., Khoury, El, A., Mathe, A.A., Ehlers, C.L., 2006. The effects of social isolation on neuropeptide Y levels, exploratory and anxiety-related behaviors in rats. *Pharmacol Biochem Behav* 83, 28–34. doi:10.1016/j.pbb.2005.12.005
- Tolardo, R., Zetterman, L., Bitencourt, D.R., Mora, T.C., de Oliveira, F.L., Biavatti, M.W.,

- Amoah, S.K.S., Burger, C., de Souza, M.M., 2010. Evaluation of behavioral and pharmacological effects of *Hedyosmum brasiliense* and isolated sesquiterpene lactones in rodents. *J Ethnopharmacol* 128, 63–70. doi:10.1016/j.jep.2009.12.026
- Tone, A., 2009. *The Age of Anxiety: A History of America's Turbulent Affair with Tranquilizers*. Basic Books, New York.
- Trimble, N., Johnson, A.C., Foster, A., Greenwood-van Meerveld, B., 2007. Corticotropin-releasing factor receptor 1-deficient mice show decreased anxiety and colonic sensitivity. *Neurogastroenterol Motil* 19, 754–760. doi:10.1111/j.1365-2982.2007.00951.x
- van Praag, H.M., 2003. Can stress cause depression? *Prog Neuropsychopharmacol Biol Psychiatry* 28, 891–907. doi:10.1016/j.pnpbp.2004.05.031
- Varty, G.B., Morgan, C.A., Cohen-Williams, M.E., Coffin, V.L., Carey, G.J., 2002. The gerbil elevated plus-maze I: behavioral characterization and pharmacological validation. *Neuropsychopharmacology* 27, 357–370. doi:10.1016/S0893-133X(02)00312-3
- Venancio, E.T., Rocha, N.F.M., Rios, E.R.V., Feitosa, M.L., Linhares, M.I., Melo, F.H.C., Matias, M.S., Fonseca, F.N., Sousa, F.C.F., Leal, L.K.A.M., Fonteles, M.M.F., 2011. Anxiolytic-like effects of standardized extract of *Justicia pectoralis* (SEJP) in mice: Involvement of GABA/benzodiazepine in receptor. *Phytother Res* 25, 444–450. doi:10.1002/ptr.3274
- Vesterinen, H.M., Sena, E.S., Egan, K.J., Hirst, T.C., Churolov, L., Currie, G.L., Antonic, A., Howells, D.W., Macleod, M.R., 2014. Meta-analysis of data from animal studies: a practical guide. *J Neurosci Methods* 221, 92–102. doi:10.1016/j.jneumeth.2013.09.010
- Viechtbauer, W., 2010. Conducting meta-analyses in R with the metafor package. *Journal of Statistical Software* 36, 1–48.
- Vinkers, C.H., Oosting, R.S., van Bogaert, M.J.V., Olivier, B., Groenink, L., 2010. Early-life



- blockade of 5-HT(1A) receptors alters adult anxiety behavior and benzodiazepine sensitivity. *Biol Psychiatry* 67, 309–316. doi:10.1016/j.biopsych.2009.08.013
- Voikar, V., Polus, A., Vasar, E., Rauvala, H., 2005. Long-term individual housing in C57BL/6J and DBA/2 mice: assessment of behavioral consequences. *Genes Brain Behav* 4, 240–252. doi:10.1111/j.1601-183X.2004.00106.x
- Volke, V., Soosaar, A., Koks, S., Vasar, E., Mannisto, P.T., 1998. L-Arginine abolishes the anxiolytic-like effect of diazepam in the elevated plus-maze test in rats. *Eur J Pharmacol* 351, 287–290.
- Wada, T., Fukuda, N., 1991. Effects of DN-2327, a new anxiolytic, diazepam and buspirone on exploratory activity of the rat in an elevated plus-maze. *Psychopharmacology (Berl)* 104, 444–450.
- Walf, A.A., Frye, C.A., 2012. Gestational or acute restraint in adulthood reduces levels of 5alpha-reduced testosterone metabolites in the hippocampus and produces behavioral inhibition of adult male rats. *Front Cell Neurosci* 6, 1–11.  
doi:10.3389/fncel.2012.00040/abstract
- Wanasuntronwong, A., Tantisira, M.H., Tantisira, B., Watanabe, H., 2012. Anxiolytic effects of standardized extract of *Centella asiatica* (ECa 233) after chronic immobilization stress in mice. *J Ethnopharmacol* 143, 579–585. doi:10.1016/j.jep.2012.07.010
- Wang, X., Li, G., Li, P., Huang, L., Huang, J., Zhai, H., 2015. Anxiolytic effects of orcinol glucoside and orcinol monohydrate in mice. *Pharm Biol* 53, 876–881.  
doi:10.3109/13880209.2014.946060
- Wei, X.Y., Yang, J.Y., Dong, Y.X., Wu, C.F., 2007. Anxiolytic-like effects of oleamide in group-housed and socially isolated mice. *Prog Neuropsychopharmacol Biol Psychiatry* 31, 1189–1195. doi:10.1016/j.pnpbp.2007.04.008
- Weninger, S.C., Dunn, A.J., Muglia, L.J., Dikkes, P., Miczek, K.A., Swiergiel, A.H., Berridge,

- C.W., Majzoub, J.A., 1999. Stress-induced behaviors require the corticotropin-releasing hormone (CRH) receptor, but not CRH. *Proc Natl Acad Sci USA* 96, 8283–8288.
- Wesolowska, A., Nikiforuk, A., 2007. Effects of the brain-penetrant and selective 5-HT6 receptor antagonist SB-399885 in animal models of anxiety and depression. *Neuropharmacology* 52, 1274–1283. doi:10.1016/j.neuropharm.2007.01.007
- Wikinski, S.I., Acosta, G.B., Gravielle, M.C., Bonavita, C.D., Bisagno, V., Fiszer de Plazas, S., Rubio, M.C., 2001. Diazepam fails to potentiate GABA-induced chloride uptake and to produce anxiolytic-like action in aged rats. *Pharmacol Biochem Behav* 68, 721–727.
- Wolfman, C., Viola, H., Paladini, A., Dajas, F., Medina, J.H., 1994. Possible anxiolytic effects of chrysin, a central benzodiazepine receptor ligand isolated from *Passiflora coerulea*. *Pharmacol Biochem Behav* 47, 1–4.
- Workman, J.L., Fonken, L.K., Gusfa, J., Kassouf, K.M., Nelson, R.J., 2011. Post-weaning environmental enrichment alters affective responses and interacts with behavioral testing to alter nNOS immunoreactivity. *Pharmacol Biochem Behav* 100, 25–32. doi:10.1016/j.pbb.2011.07.008
- Wright, R.C., Ingenito, A.J., 2001. Prevention of isolation-induced hypertension by intrahippocampal administration of a nonpeptide kappa-opioid receptor agonist. *Hippocampus* 11, 445–451. doi:10.1002/hipo.1059
- Yadav, A.V., Kawale, L.A., Nade, V.S., 2008. Effect of *Morus alba* L. (mulberry) leaves on anxiety in mice. *Indian J Pharmacol* 40, 32–36. doi:10.4103/0253-7613.40487
- Yamada, K., Iida, R., Miyamoto, Y., Saito, K., Sekikawa, K., Seishima, M., Nabeshima, T., 2000. Neurobehavioral alterations in mice with a targeted deletion of the tumor necrosis factor-alpha gene: implications for emotional behavior. *J Neuroimmunol* 111, 131–138.
- Yao, Y., Jia, M., Wu, J.-G., Zhang, H., Sun, L.-N., Chen, W.-S., Rahman, K., 2010. Anxiolytic and sedative-hypnotic activities of polygalasaponins from *Polygala tenuifolia*

- in mice. *Pharm Biol* 48, 801–807. doi:10.3109/13880200903280042
- Yasumatsu, H., Morimoto, Y., Yamamoto, Y., Takehara, S., Fukuda, T., Nakao, T., Setoguchi, M., 1994. The pharmacological properties of Y-23684, a benzodiazepine receptor partial agonist. *Br J Pharmacol* 111, 1170–1178.
- Yildirim, E., Erol, K., Ulupinar, E., 2012. Effects of sertraline on behavioral alterations caused by environmental enrichment and social isolation. *Pharmacol Biochem Behav* 101, 278–287. doi:10.1016/j.pbb.2011.12.017
- Yildizoglu, T., Weislogel, J.-M., Mohammad, F., Chan, E.S.Y., Assam, P.N., Claridge-Chang, A., 2015. Estimating Information Processing in a Memory System: The Utility of Meta-analytic Methods for Genetics. *PLoS Genet* 11, e1005718. doi:10.1371/journal.pgen.1005718
- Yorgason, J.T., Espana, R.A., Konstantopoulos, J.K., Weiner, J.L., Jones, S.R., 2013. Enduring increases in anxiety-like behavior and rapid nucleus accumbens dopamine signaling in socially isolated rats. *Eur J Neurosci* 37, 1022–1031. doi:10.1111/ejn.12113
- Zanoli, P., Rivasi, M., Baraldi, C., Baraldi, M., 2002. Pharmacological activity of hyperforin acetate in rats. *Behav Pharmacol* 13, 645–651. doi:10.1097/01.fbp.0000047149.28986.2e
- Zhang, L.-M., Zhao, N., Guo, W.-Z., Jin, Z.-L., Qiu, Z.-K., Chen, H.-X., Xue, R., Zhang, Y.-Z., Yang, R.-F., Li, Y.-F., 2014. Antidepressant-like and anxiolytic-like effects of YL-IPA08, a potent ligand for the translocator protein (18 kDa). *Neuropharmacology* 81, 116–125. doi:10.1016/j.neuropharm.2013.09.016
- Zhang, Y., Zu, X., Luo, W., Yang, H., Luo, G., Zhang, M., Tang, S., 2012. Social isolation produces anxiety-like behaviors and changes PSD-95 levels in the forebrain. *Neurosci Lett* 514, 27–30. doi:10.1016/j.neulet.2012.02.043
- Zhao, S., Edwards, J., Carroll, J., Wiedholz, L., Millstein, R.A., Jaing, C., Murphy, D.L.,

Lanthorn, T.H., Holmes, A., 2006. Insertion mutation at the C-terminus of the serotonin transporter disrupts brain serotonin function and emotion-related behaviors in mice.

Neuroscience 140, 321–334. doi:10.1016/j.neuroscience.2006.01.049

Zheng, F., Adelsberger, H., Muller, M.R., Fritschy, J.M., Werner, S., Alzheimer, C., 2009.

Activin tunes GABAergic neurotransmission and modulates anxiety-like behavior. Mol

Psychiatry 14, 332–346. doi:10.1038/sj.mp.4002131

## FIGURES AND TABLES

### **Figure 1. Flow chart of the systematic literature review of 10 anxiotropic interventions.**

The literature was reviewed in a four-stage process, starting with searches of the Pubmed and EMBASE databases that yielded 1169 articles, followed by three screens of increasing detail, reviewing the article title, abstract, and full text for experimental design. A total of 306 articles were used in the meta-analysis. Further details are given in Table 1 and the Methods section.

### **Figure 2. Funnel plots of three meta-analyses with evidence for publication bias.**

Where at least ten experiments were available for meta-analysis, the effect sizes (Hedges'  $g$ ) of the experiments are plotted against their respective standard errors. Points on each plot represent individual experiments. The triangle bounded by dotted lines indicates the area where 95% of studies are expected to fall, in the absence of both publication bias and study heterogeneity. Shown here are funnel plots for experiments on (A) diazepam, (B) social isolation, --and (C) *Htt* knockout.

### **Figure 3. Meta-analysis of diazepam on rodent anxiety related behavior.**

Meta-analysis of rodent diazepam effect sizes, shown as a forest plot of standardized effect sizes (Hedges'  $g$ ). The meta-analysis is sub-grouped by animal species. Error bars indicate the 95% confidence intervals of standardized mean difference. The weighted average mean effect size of subgroups and all studies is represented by the central vertices of a red diamond; the outer vertices indicate the 95% confidence intervals. Control and treatment samples sizes are given in the columns listed as  $N_c$  and  $N_T$  respectively.

**Figure 4. Meta-analyses of serotonin receptor 1A interventions on rodent anxiety-related behaviors.**

Meta-analysis of effect sizes of serotonin-targeted interventions is shown as a forest plot of standardized effect sizes (Hedges'  $g$ ). Error bars indicate the 95% confidence intervals of  $g$ . The weighted average mean effect size of all studies is represented by the central vertices of a red diamond; the outer vertices indicate the 95% confidence intervals. Control and treatment samples sizes ( $N_C$ ,  $N_T$ ) and the assay types of the studies are given; elevated plus maze (EPM), open field (OF) and light-dark box (LD). Effects of: A. Serotonin receptor gene *Htr1a* knockout models. B. *Htr1a* overexpression.

**Figure 5. Meta-analyses of serotonin transporter interventions on rodent anxiety-related behaviors.**

Meta-analysis of effect sizes of serotonin-targeted interventions is shown as a forest plot of standardized effect sizes (Hedges'  $g$ ). Error bars indicate the 95% confidence intervals of  $g$ . The weighted average mean effect size of all studies is represented by the central vertices of a red diamond; the outer vertices indicate the 95% confidence intervals. Control and treatment samples sizes ( $N_C$ ,  $N_T$ ) and the assay types of the studies are given; elevated plus maze (EPM), open field (OF) and light-dark box (LD). Effects of: A. Serotonin transporter gene (*Htt*) knockout models B. *Htt* overexpression models.

**Figure 6. Meta-analyses of the effects of stress signaling genes on anxiety-related behaviors.**

Meta-analysis of effect sizes of stress signaling genes, shown as a forest plot of standardized effect sizes (Hedges'  $g$ ). Error bars indicate the 95% confidence intervals

of  $g$ . The weighted average mean effect size of all studies is represented by the central vertices of a red diamond; the outer vertices indicate the 95% confidence intervals. Control and treatment samples sizes ( $N_C$ ,  $N_T$ ) and the assay types of the studies are given; elevated plus maze (EPM), open field (OF) and light-dark box (LD). Effects of: A. *Crh* gene knockout models. B. *Crhr1* gene knockout models.

**Figure 7. Meta-analyses of experiments on the stress-anxiety relationship in rodents.**

Meta-analysis of effect sizes of stress-anxiety interventions, shown as a forest plot of standardized effect sizes (Hedges'  $g$ ). Error bars indicate the 95% confidence intervals of  $g$ . The weighted average mean effect size of all studies is represented by the central vertices of a red diamond; the outer vertices indicate the 95% confidence intervals. Control and treatment samples sizes ( $N_C$ ,  $N_T$ ) and the assay types of the studies are given; elevated plus maze (EPM), open field (OF) and light-dark box (LD). Effects of: A. Acute pain. B. Restraint stress (immobilization). C. Social isolation.

**Figure 8. Summary effect sizes of all meta-analyses.**

The weighted mean effect sizes of all 10 interventions are shown here. Each mean effect size is represented by the central vertices of a diamond; the outer vertices indicate the 95% confidence intervals. The horizontal axis is Hedges'  $g$ , the standard deviation change relative to control animals. Color indicates direction (green = anxiolytic, red = anxiogenic) and statistical significance (grey = statistically non-significant). The diamonds for the diazepam, social isolation, and *Htt* KO meta-analyses represent the summary effect sizes after trim-and-fill bias correction.

**Table 1. Summary of systematic reviews of anxiety-related interventions in mouse and rat.**

The PubMed and Embase query phrases used to identify articles that might contain data relevant to the interventions and assays of interest are detailed. Title, abstract and full-text searches were performed to identify articles meeting the selected criteria.

**Table 2. Results of Egger's linear regression test for funnel plot asymmetry across six meta-analyses**

Where at least twenty experiments were available for meta-analysis, Egger's linear regression test for funnel plot asymmetry was performed. For each meta-analysis, the number of included studies, the vertical intercept of the linear regression, the corresponding 95% confidence interval for the intercept, and the P-values of Egger's test are listed.

**Table 3. Characteristics of included experiments.**

Characteristics of experiments from included studies are listed with Pubmed ID, year of study, and figure panel. The assay type, assay duration, variable used in experiment, route of injection, drug dosage, treatment duration, species, strain and gender are also detailed. Assay duration and treatment duration are listed in minutes. Dosage is listed in mg per kg body weight of animal. Cells containing NS (Not Specified) indicate that the information was not available in the study.



## **Supplementary Legends**

**Supplementary Information 1. Spreadsheet containing extracted data (.xlsx file).**

**Each dataset is in a separate sheet in the Excel file.**

**Supplementary Information 2. Extracted meta-analytic data in R-compatible format (.RData file)**

**Supplementary Information 3. R markdown code (.Rmd) used for meta-analysis and plotting**

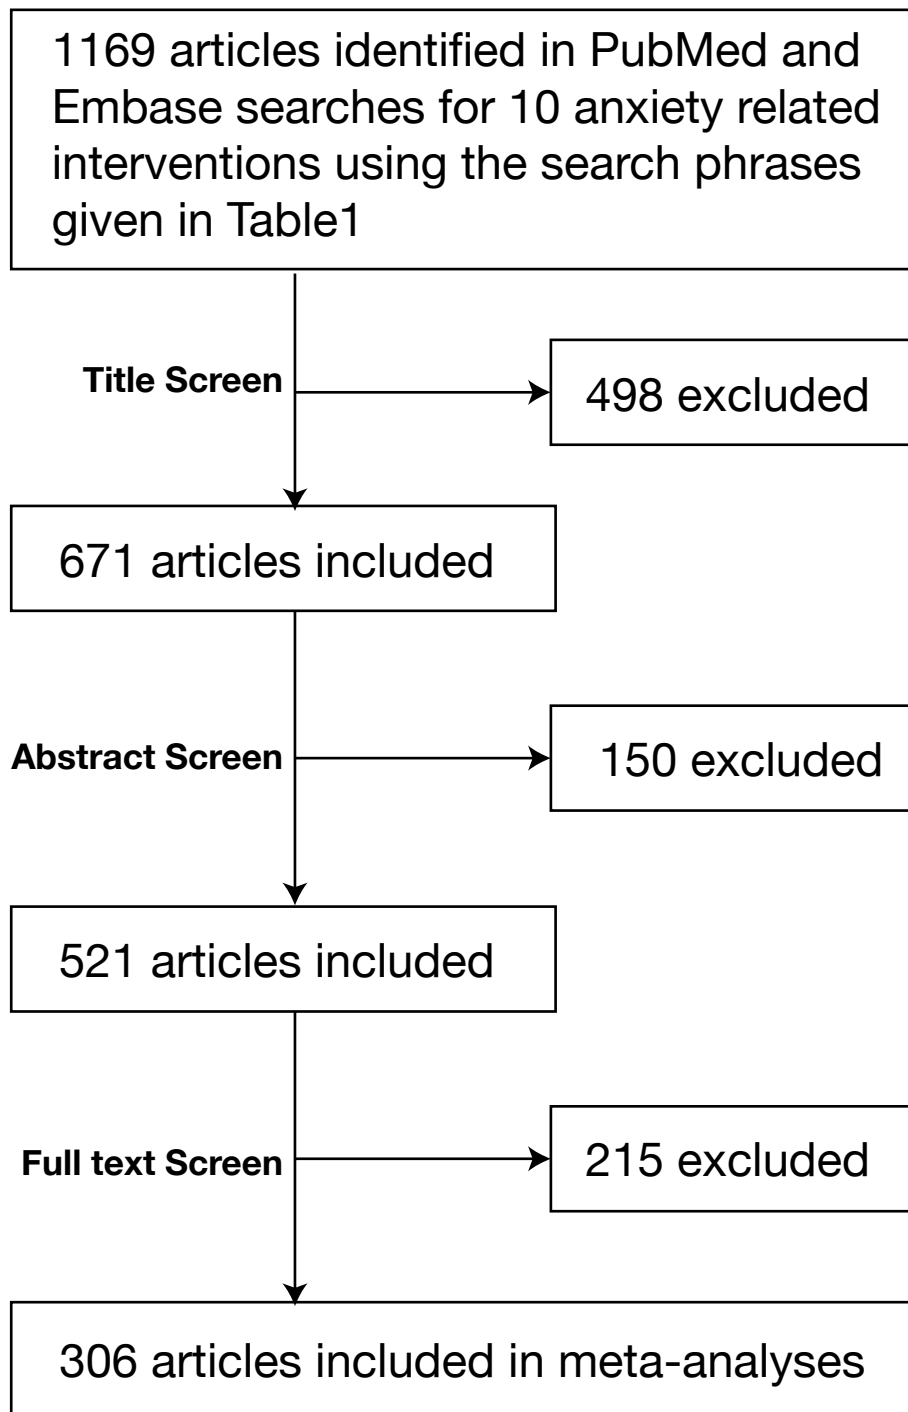

**Figure 1. Flow chart of the systematic literature review of 10 anxiotropic interventions.** The literature was reviewed in a four-stage process, starting with searches of the Pubmed and EMBASE databases that yielded 1169 articles, followed by three screens of increasing detail, reviewing the article title, abstract, and full text for experimental design. A total of 306 articles were used in the meta-analysis. Further details are given in Table 1 and the Methods section.

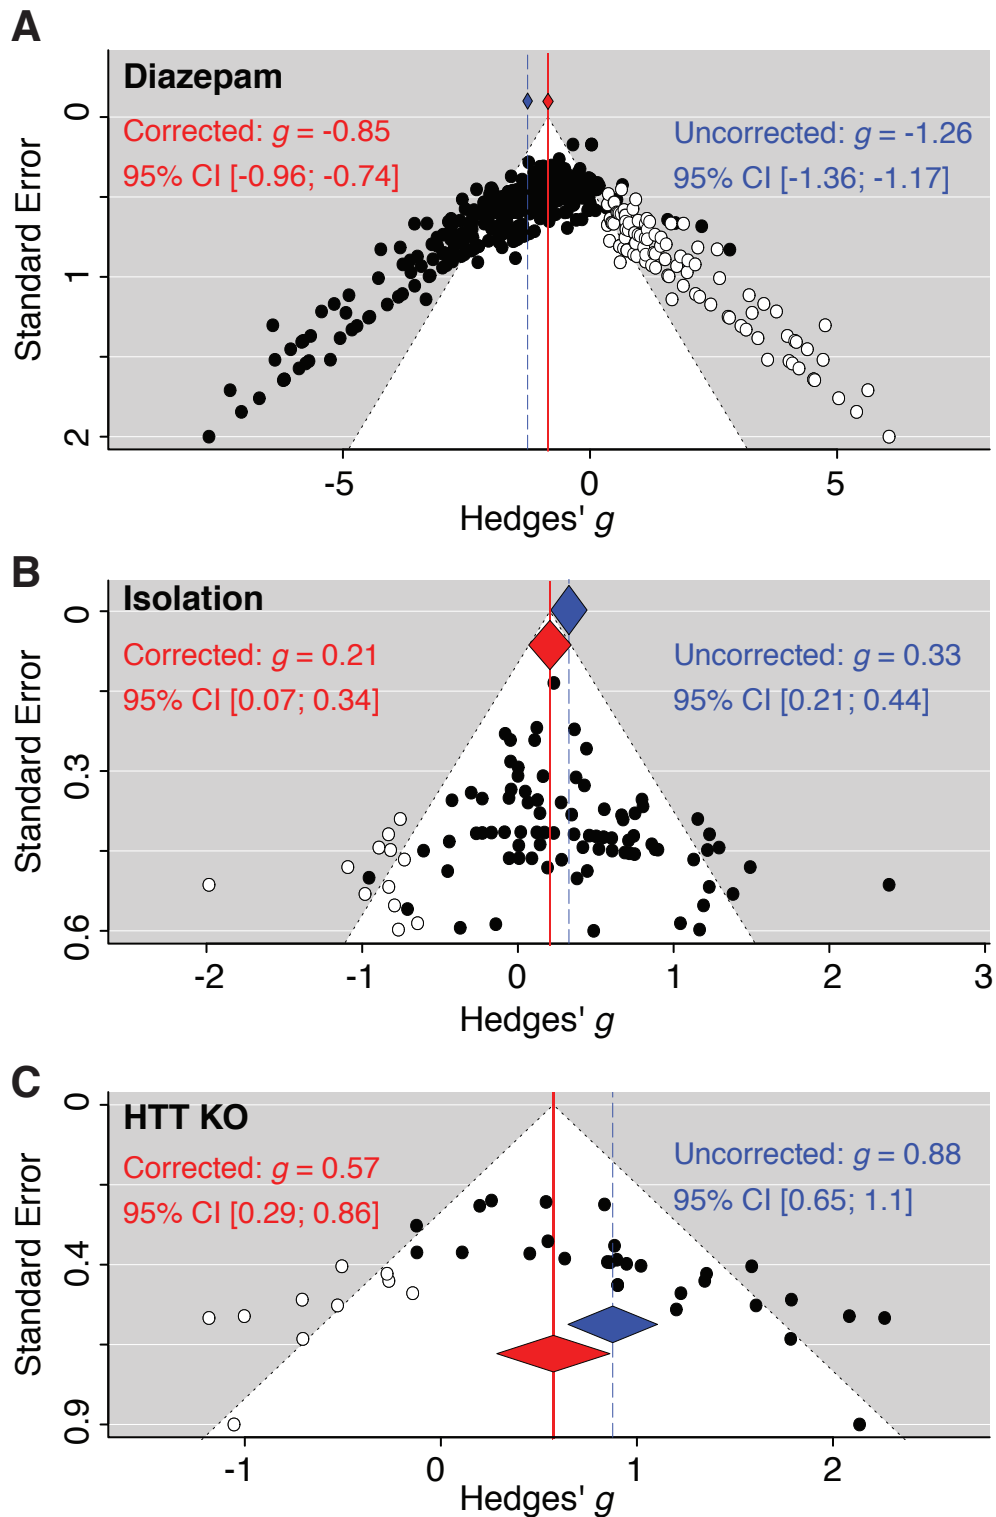

**Figure 2. Funnel plots of three meta-analyses with evidence for publication bias.** Where at least ten experiments were available for meta-analysis, the effect sizes (Hedges'  $g$ ) of the experiments are plotted against their respective standard errors. Points on each plot represent individual experiments. The triangle bounded by dotted lines indicates the area where 95% of studies are expected to fall, in the absence of both publication bias and study heterogeneity. Shown here are funnel plots for experiments on (A) diazepam, (B) social isolation, and (C) Htt knockout.



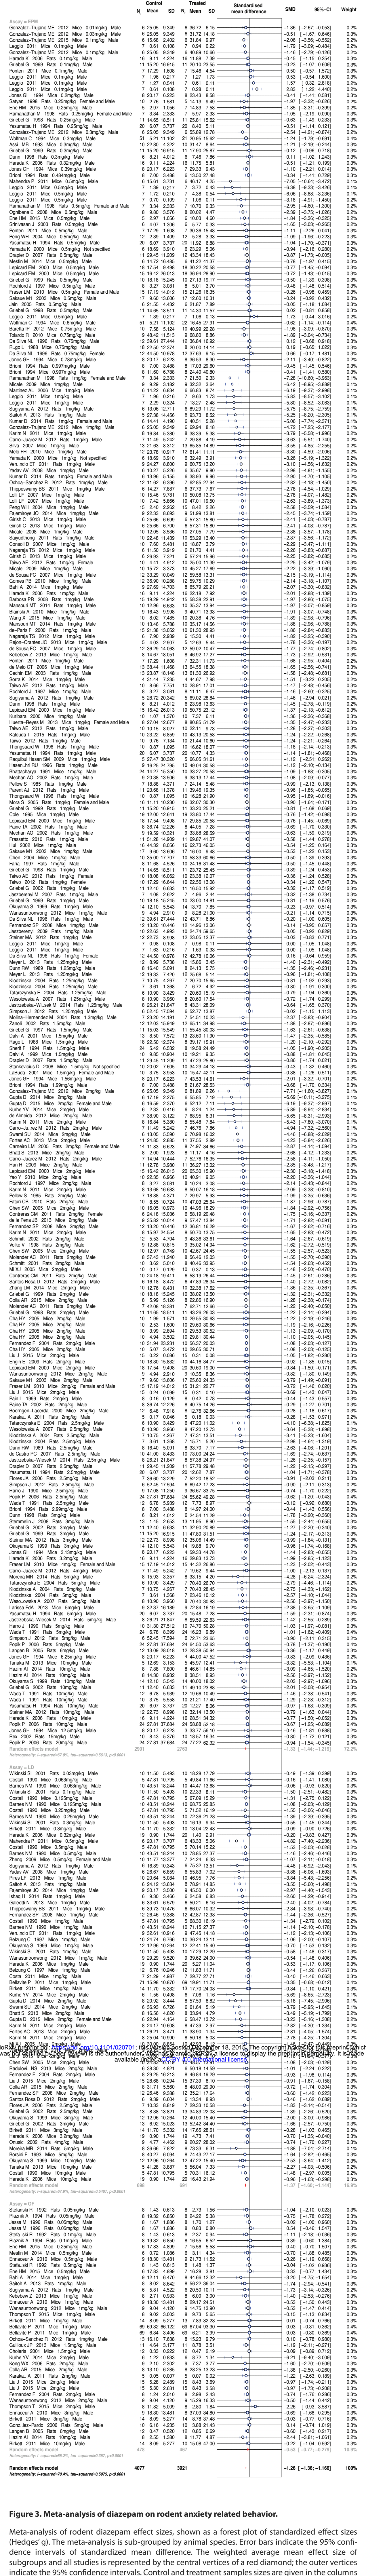

Figure 3. Meta-analysis of diazepam on rodent anxiety-related behavior.

Meta-analysis of rodent diazepam effect sizes, shown as a forest plot of standardized effect sizes (Hedges' g). The meta-analysis is sub-grouped by animal species. Error bars indicate the 95% confidence intervals of standardized mean difference. The weighted average mean effect size of all subgroups and all studies is represented by the central vertical red diamond; the outer vertical lines indicate the 95% confidence intervals. Control and treatment samples sizes are given in the columns listed as Nc and Nt respectively.



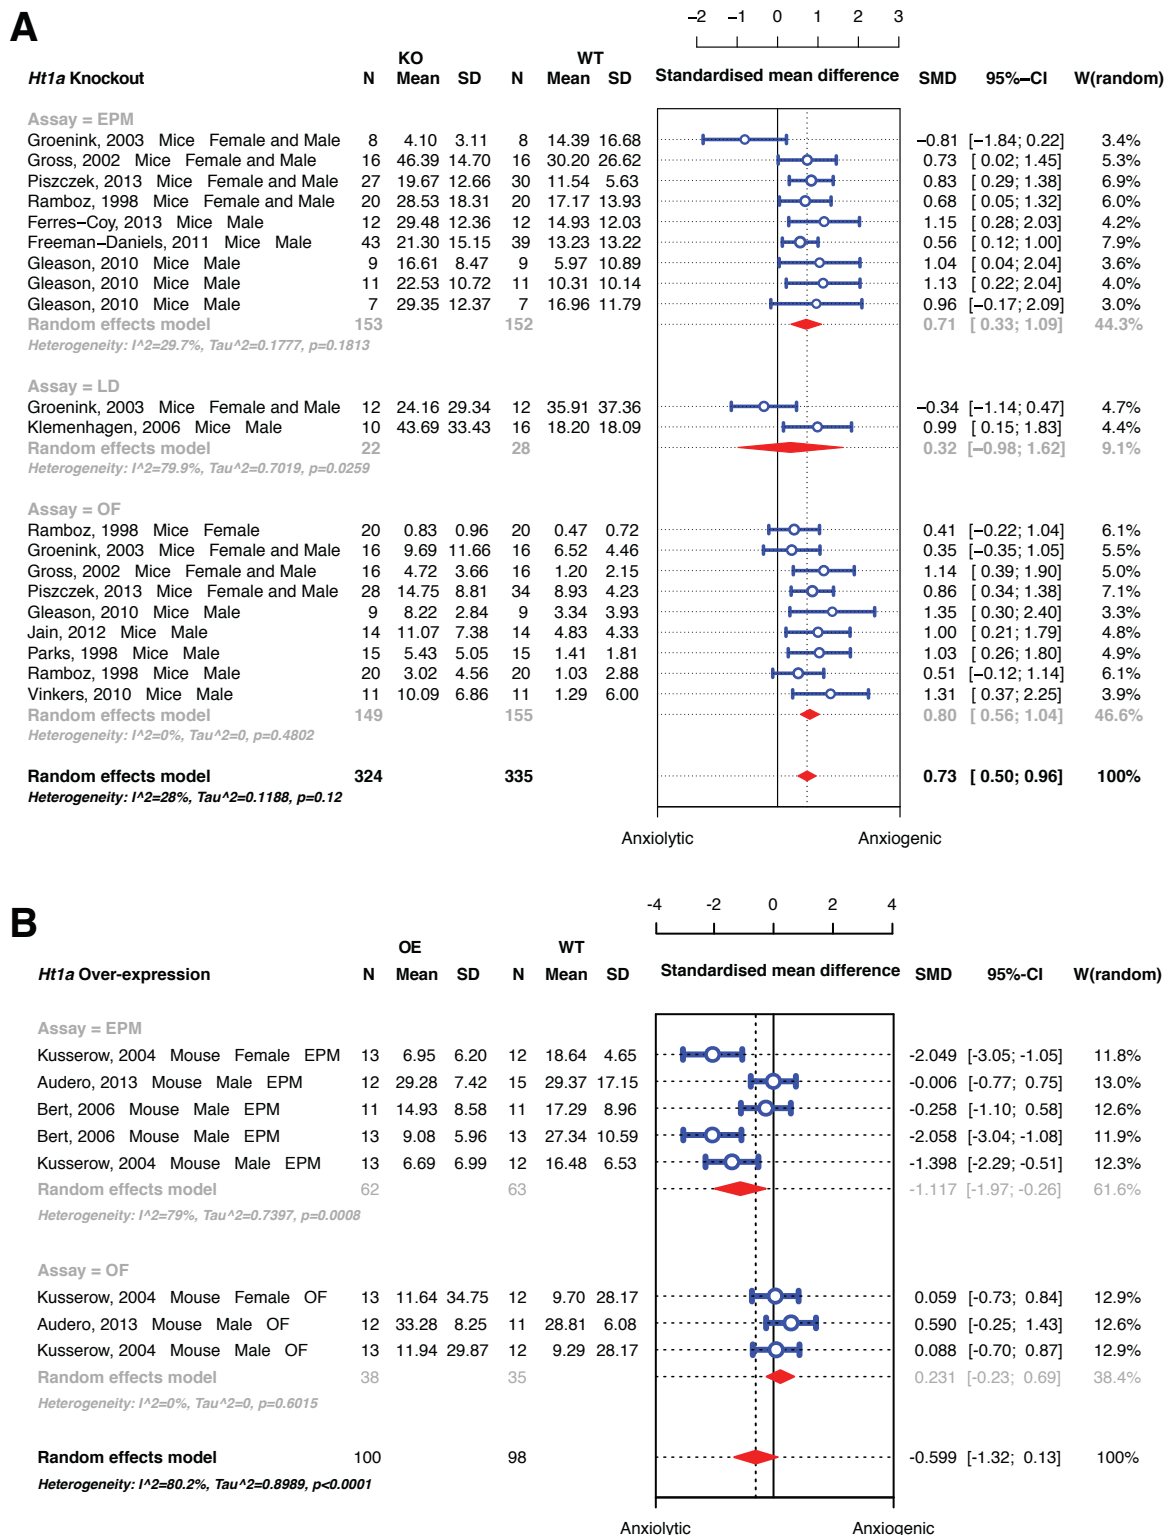

**Figure 4. Meta-analyses of serotonin receptor 1A interventions on rodent anxiety-related behaviors.** Meta-analysis of effect sizes of serotonin-targeted interventions is shown as a forest plot of standardized effect sizes (Hedges' g). Error bars indicate the 95% confidence intervals of g. The weighted average mean effect size of all studies is represented by the central vertices of a red diamond; the outer vertices indicate the 95% confidence intervals. Control and treatment sample sizes ( $N_C$ ,  $N_T$ ) and the assay types of the studies are given; elevated plus maze (EPM), open field (OF) and light-dark box (LD). Effects of: **A.** Serotonin receptor gene *Htr1a* knockout models. **B.** *Htr1a* overexpression.

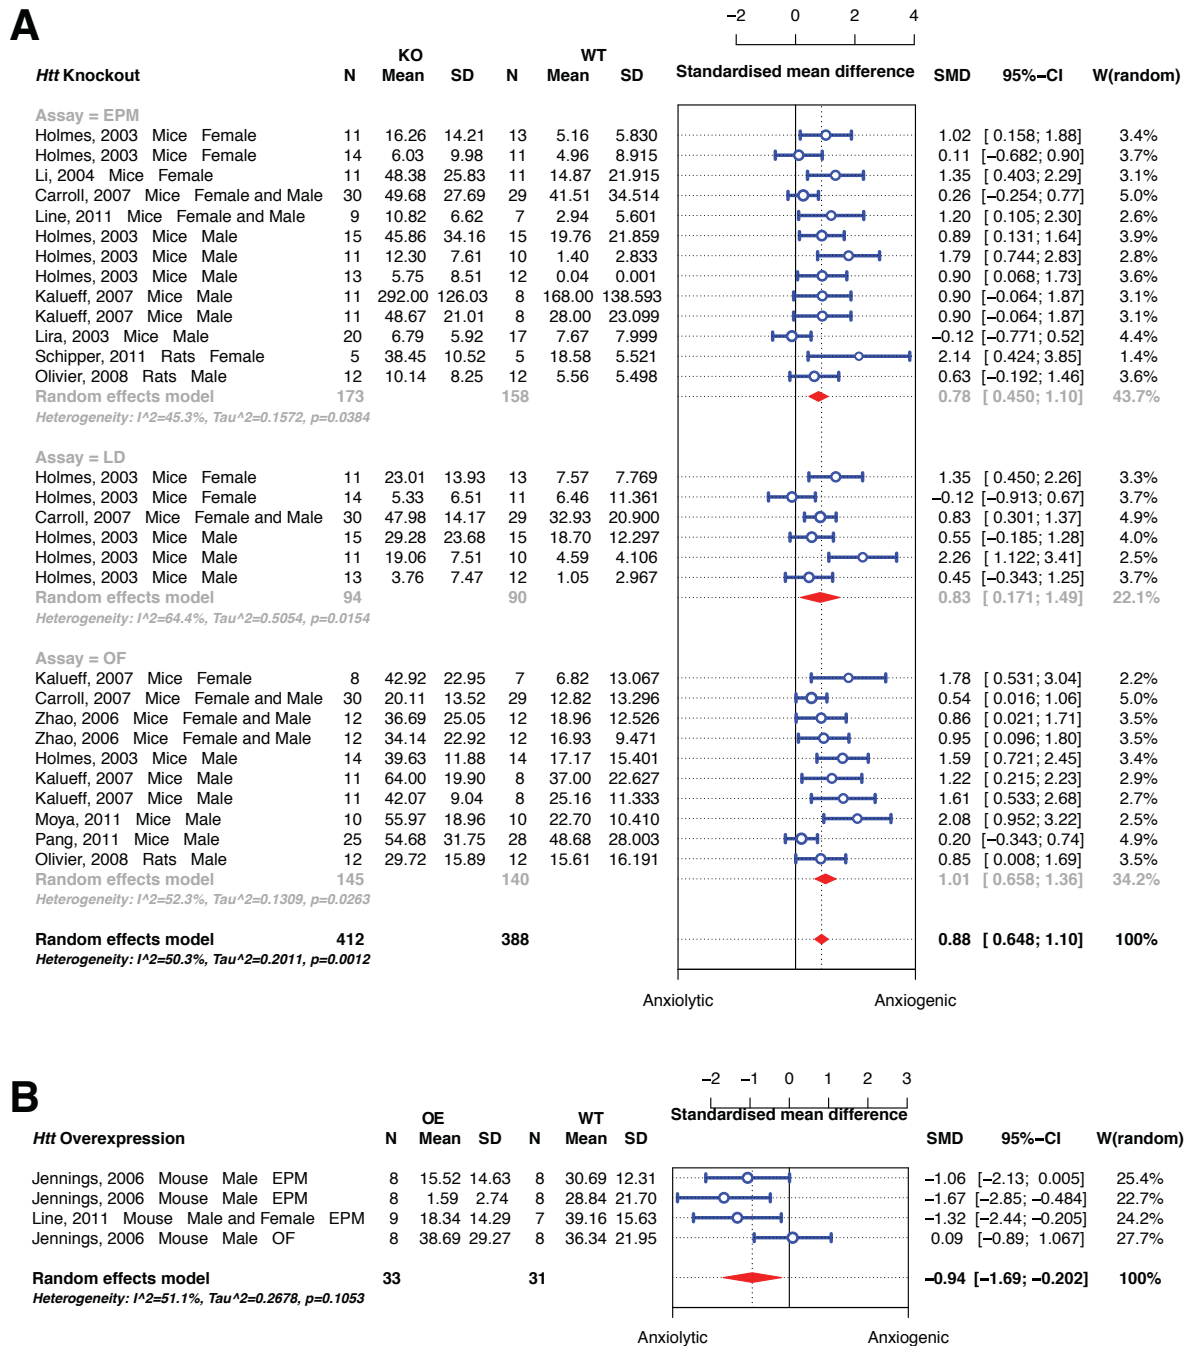

**Figure 5. Meta-analyses of serotonin transporter interventions on rodent anxiety-related behaviors.** Meta-analysis of effect sizes of serotonin-targeted interventions is shown as a forest plot of standardized effect sizes (Hedges' g). Error bars indicate the 95% confidence intervals of g. The weighted average mean effect size of all studies is represented by the central vertices of a red diamond; the outer vertices indicate the 95% confidence intervals. Control and treatment samples sizes ( $N_C$ ,  $N_T$ ) and the assay types of the studies are given; elevated plus maze (EPM), open field (OF) and light-dark box (LD). Effects of: **A.** Serotonin transporter gene (Htt) knockout models **B.** Htt overexpression models.

**A**

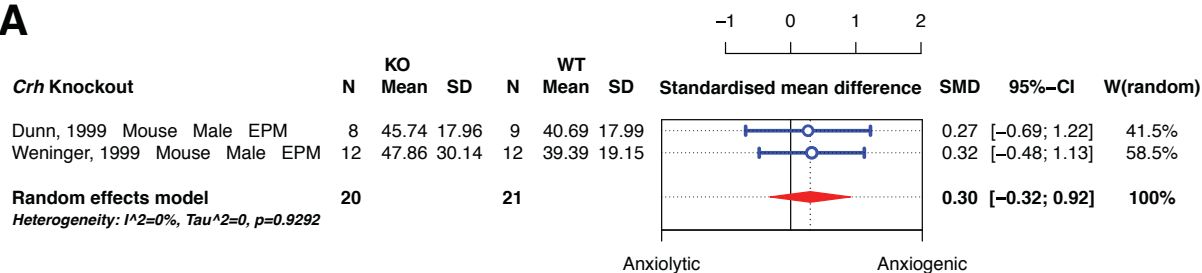

**B**

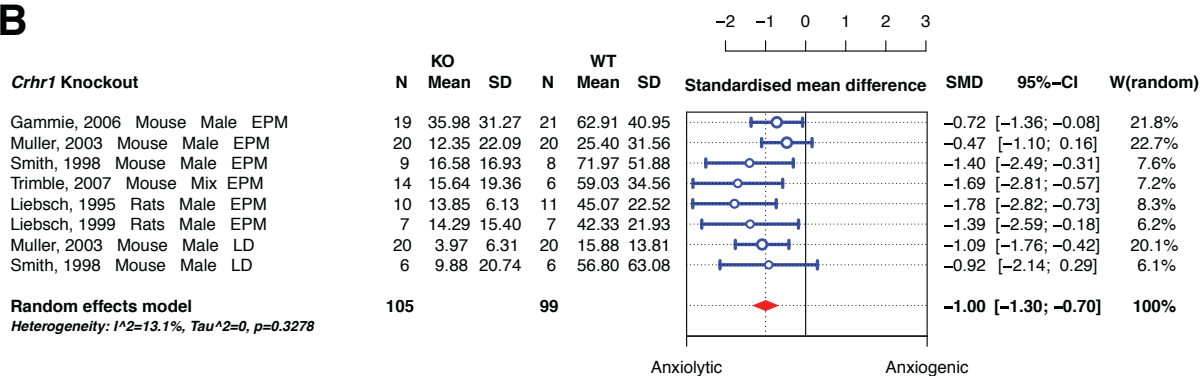

**Figure 6. Meta-analyses of the effects of stress signaling genes on anxiety-related behaviors.** Meta-analysis of effect sizes of stress signaling genes, shown as a forest plot of standardized effect sizes (Hedges'  $g$ ). Error bars indicate the 95% confidence intervals of  $g$ . The weighted average mean effect size of all studies is represented by the central vertices of a red diamond; the outer vertices indicate the 95% confidence intervals. Control and treatment samples sizes ( $N_C$ ,  $N_T$ ) and the assay types of the studies are given; elevated plus maze (EPM), open field (OF) and light-dark box (LD). Effects of: **A.** *Crh* gene knockout models. **B.** *Crhr1* gene knockout models.

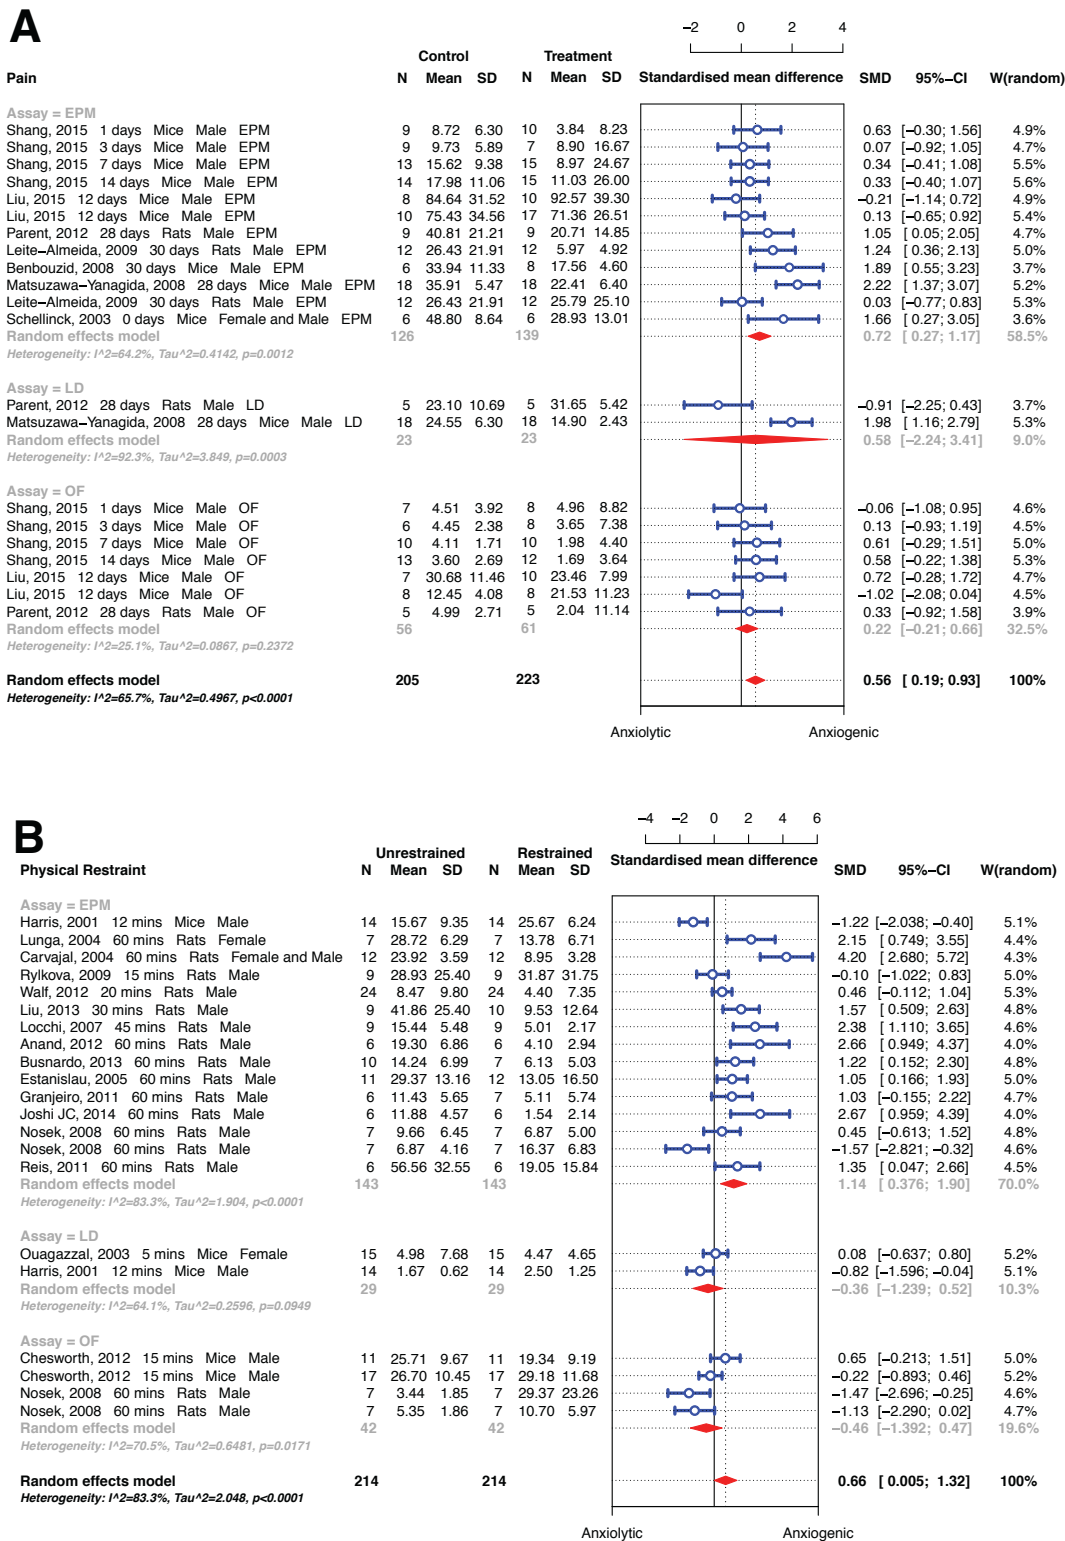

**Figure 7. Part 1. Meta-analyses of experiments on the stress-anxiety relationship in rodents.** Meta-analysis of effect sizes of stress-anxiety interventions, shown as a forest plot of standardized effect sizes (Hedges' g). Error bars indicate the 95% confidence intervals of g. The weighted average mean effect size of all studies is represented by the central vertices of a red diamond; the outer vertices indicate the 95% confidence intervals. Control and treatment samples sizes ( $N_C$ ,  $N_T$ ) and the assay types of the studies are given; elevated plus maze (EPM), open field (OF) and light-dark box (LD). Effects of: A. Acute pain. B. Restraint stress (immobilization). C. Social isolation.





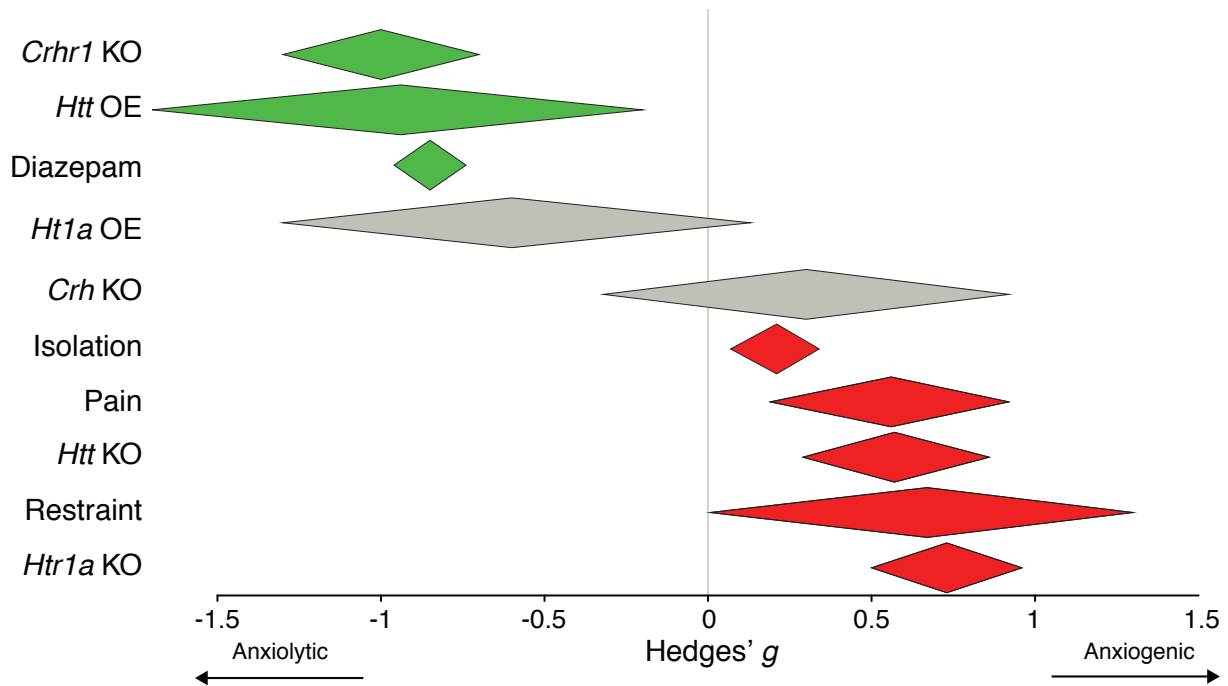

**Figure 8. Summary effect sizes of all meta-analyses.** The weighted mean effect sizes of all 10 interventions are shown here. Each mean effect size is represented by the central vertices of a diamond; the outer vertices indicate the 95% confidence intervals. The horizontal axis is Hedges'  $g$ , the standard deviation change relative to control animals. Color indicates direction (green = anxiolytic, red = anxiogenic) and statistical significance (grey = statistically non-significant). The diamonds for the diazepam, social isolation, and *Htt* KO meta-analyses represent the summary effect sizes after trim-and-fill bias correction.

**Table 1. Summary of systematic reviews of anxiety-related interventions in mouse and rat. The PubMed and EMBASE query phrases below were used to identify articles that might contain data relevant to the interventions and assays of interest. Of the hits, title, abstract and full-text study and experiment selections were performed to yield the articles meeting criteria.**

| <b>Intervention</b>         | <b>Query phrase used in PubMed and Embase for study selection</b>                                                                                                                                                    | <b>Articles identified by phrase</b> | <b>Articles meeting meta-analysis criteria</b> |
|-----------------------------|----------------------------------------------------------------------------------------------------------------------------------------------------------------------------------------------------------------------|--------------------------------------|------------------------------------------------|
| <b>Diazepam</b>             | (diazepam OR valium) AND anxiety AND (open field OR exploratory) AND (rodent OR rat OR rats OR mouse OR mice OR Mus)                                                                                                 | 540                                  | 172                                            |
| <b>Ht1a knockout</b>        | (serotonin1A receptor OR 5-HT1A receptor) AND knockout AND anxiety                                                                                                                                                   | 85                                   | 12                                             |
| <b>Ht1a over-expression</b> | (serotonin1A receptor OR 5-HT1A receptor) AND (overexpression OR over-expression OR overexpressing) AND anxiety                                                                                                      | 13                                   | 3                                              |
| <b>Htt knockout</b>         | (serotonin transporter) AND (knockout OR knockdown OR deletion OR antisense) AND anxiety AND (elevated plus maze OR open field OR light-dark) AND (rats OR rat OR mice OR mouse OR Mus)                              | 37                                   | 13                                             |
| <b>Htt over-expression</b>  | serotonin transporter AND anxiety AND (elevated plus maze OR open field OR light-dark) AND (increased OR over-expression OR overexpressing OR transgenic) AND (rats OR rat OR mice OR mouse OR Mus)                  | 65                                   | 2                                              |
| <b>Crh knockout</b>         | ((corticotropin-releasing) AND (stress-induced behaviors OR stress-related behaviors or Behavioral responses to stress OR Behavioral responses to stress)) AND (CRH-deficient mice OR lacking the CRH gene OR CRFko) | 12                                   | 2                                              |
| <b>Crhr1 knockout</b>       | (corticotropin releasing factor receptor 1-deficient mice) OR CRH1 receptor antisense oligodeoxynucleotide OR Crhr1 null mutants OR Corticotropin-releasing hormone receptor antisense                               | 62                                   | 6                                              |
| <b>Pain</b>                 | (inflammatory pain OR neuropathic pain) AND anxiety AND (elevated plus maze OR open field OR light-dark) AND (rats OR rat OR mice OR mouse OR Mus)                                                                   | 73                                   | 7                                              |
| <b>Restraint</b>            | acute restraint AND anxiety AND (elevated plus maze OR open field OR light-dark) AND (rats OR rat OR mice OR mouse OR Mus)                                                                                           | 87                                   | 15                                             |
| <b>Isolation</b>            | (social isolation OR single housing) AND anxiety AND (elevated plus maze OR plus-maze OR open field OR OFT OR light-dark) AND (rats OR rat OR mice OR mouse OR Mus)                                                  | 167                                  | 50                                             |

**Table 2. Results of Egger's linear regression test for funnel plot asymmetry across six meta-analyses.** Where at least twenty experiments were available for meta-analysis, Egger's linear regression test for funnel plot asymmetry was performed. For each meta-analysis, the number of included studies, the vertical intercept of the linear regression, the corresponding 95% confidence interval for the intercept, and the P-values of Egger's test are listed.

|                 | No. of Experiments | No. of Studies | Hedges' <i>g</i> [95% CI] | p-value   | I <sup>2</sup> [95% CI] | Egger's Test p-value | No. of Experiments Added After Trim-and-Fill | Adjusted Hedges' <i>g</i> [95% CI] | p-value Adjusted Hedges' <i>g</i> |
|-----------------|--------------------|----------------|---------------------------|-----------|-------------------------|----------------------|----------------------------------------------|------------------------------------|-----------------------------------|
| Diazepam        | 386                | 172            | -1.3 [-1.4; -1.2]         | 1.36e-144 | 70.4 [67.2; 73.3]       | 2.35e-56             | 102                                          | -0.85 [-0.96; -0.74]               | 4.72e-56                          |
| Isolation       | 83                 | 50             | 0.33 [0.21; 0.44]         | 3.37e-08  | 26.9 [3.5; 44.6]        | 0.0146               | 12                                           | 0.21 [0.069; 0.34]                 | 0.00316                           |
| <i>Htt</i> KO   | 29                 | 13             | 0.88 [0.65; 1.1]          | 5.18e-14  | 50.3 [23.7; 67.6]       | 6.72e-06             | 10                                           | 0.57 [0.29; 0.86]                  | 9.71e-05                          |
| Restraint       | 21                 | 16             | 0.67 [0.0062; 1.3]        | 0.0479    | 83.4 [75.8; 88.7]       | 0.0305               | 0                                            | 0.67 [0.0062; 1.3]                 | 0.0479                            |
| Pain            | 21                 | 7              | 0.56 [0.19; 0.92]         | 0.00283   | 65.1 [44.6; 78]         | 0.763                | NA                                           | NA                                 | NA                                |
| <i>Htt1a</i> KO | 20                 | 11             | 0.73 [0.5; 0.96]          | 3.15e-10  | 28.0 [0; 58.2]          | 0.545                | NA                                           | NA                                 | NA                                |
| <i>Htt1a</i> OE | 8                  | 3              | -0.6 [-1.3; 0.13]         | 0.105     | 80.2 [61.8; 89.8]       | NA                   | NA                                           | NA                                 | NA                                |
| <i>Crhr1</i> KO | 8                  | 6              | -1 [-1.3; -0.7]           | 6.64e-11  | 13.1 [0; 55.7]          | NA                   | NA                                           | NA                                 | NA                                |
| <i>Htt</i> OE   | 4                  | 2              | -0.94 [-1.7; -0.2]        | 0.0127    | 51.1 [0; 83.8]          | NA                   | NA                                           | NA                                 | NA                                |
| <i>Crh</i> KO   | 2                  | 2              | 0.3 [-0.32; 0.92]         | 0.34      | 0 [NA; NA]              | NA                   | NA                                           | NA                                 | NA                                |
